# Supplementary material for: Forests influence yeast populations vectored by insects into vineyards
Source: PubMed Central journal article supplement (PMC9719976; doi:10.3389/fmicb.2022.1039939), 2022-11-21
Supplement: Data_Sheet_1.pdf [file Data_Sheet_1.pdf]

## *Supplementary Material*

### **Forests influence yeast populations vectored by insects into vineyards**

Beatrice Valentini, Luca Pietro Casacci, Anna Luganini, Francesca Barbero, Irene Stefanini

Department of Life Sciences and Systems Biology, University of Turin, Turin, Italy

This pdf file includes:

#### **Supplementary Figures**

[Supplementary figure 1](#): Sampled areas.

[Supplementary figure 2](#): Comparison of yeast abundances observed in insects' guts.

[Supplementary figure 3](#): Distribution of insects resulting in yeast isolation.

[Supplementary figure 4](#): Alpha diversities of yeast populations in insects' guts.

[Supplementary figure 5](#): PCoA based on Jaccard distances among yeast populations in sampled insects.

[Supplementary figure 6](#): PCoA based on Unifrac distances among yeast populations in sampled insects.

[Supplementary figure 7](#): Correlations between the frequency of isolation of yeast species and land cover, topographic, and pedological characteristics of the vineyards and their surrounding areas.

[Supplementary figure 8](#): Growth capabilities of yeast species isolated from the intestine of the analyzed insects.

[Supplementary figure 9](#): Comparison of the growth ratio of strains grouped according to the species.

[Supplementary figure 10](#): Yeast species clustering according to the quantified traits.

#### **Supplementary Tables**

**Supplementary table 1**: Details on the vineyards sampled in this study (provided as a separate file).

**Supplementary table 2**: Details on the insects caught in this study (provided as a separate file).

**Supplementary table 3**: Details on the yeast strains isolated in this study (provided as a separate file).

[Supplementary table 4](#): Strains used as the representatives of the species for phenotypic tests.

**Supplementary table 5**: Comparison of yeasts' phenotypic characteristics associated with different capabilities of growing in different media (provided as a separate file).

[Supplementary table 6](#): Results of Wilcoxon-Mann-Whitney tests on phenotypes of tested strains.

#### **Supplementary results**

[Supplementary statistical results](#): Detailed results of the statistical analyses carried out in the study.

Supplementary Figures and Tables

**Supplementary Figure 1. Sampled areas.** A) Red and yellow indexes indicate vineyards close to woods (“VW”, Vineyards close to Woods) or far from woods (“ctrl”, “VC”, Vineyards used as the Control), respectively. The map was obtained with Google Earth Version 9.168.0.0 (April 2020).

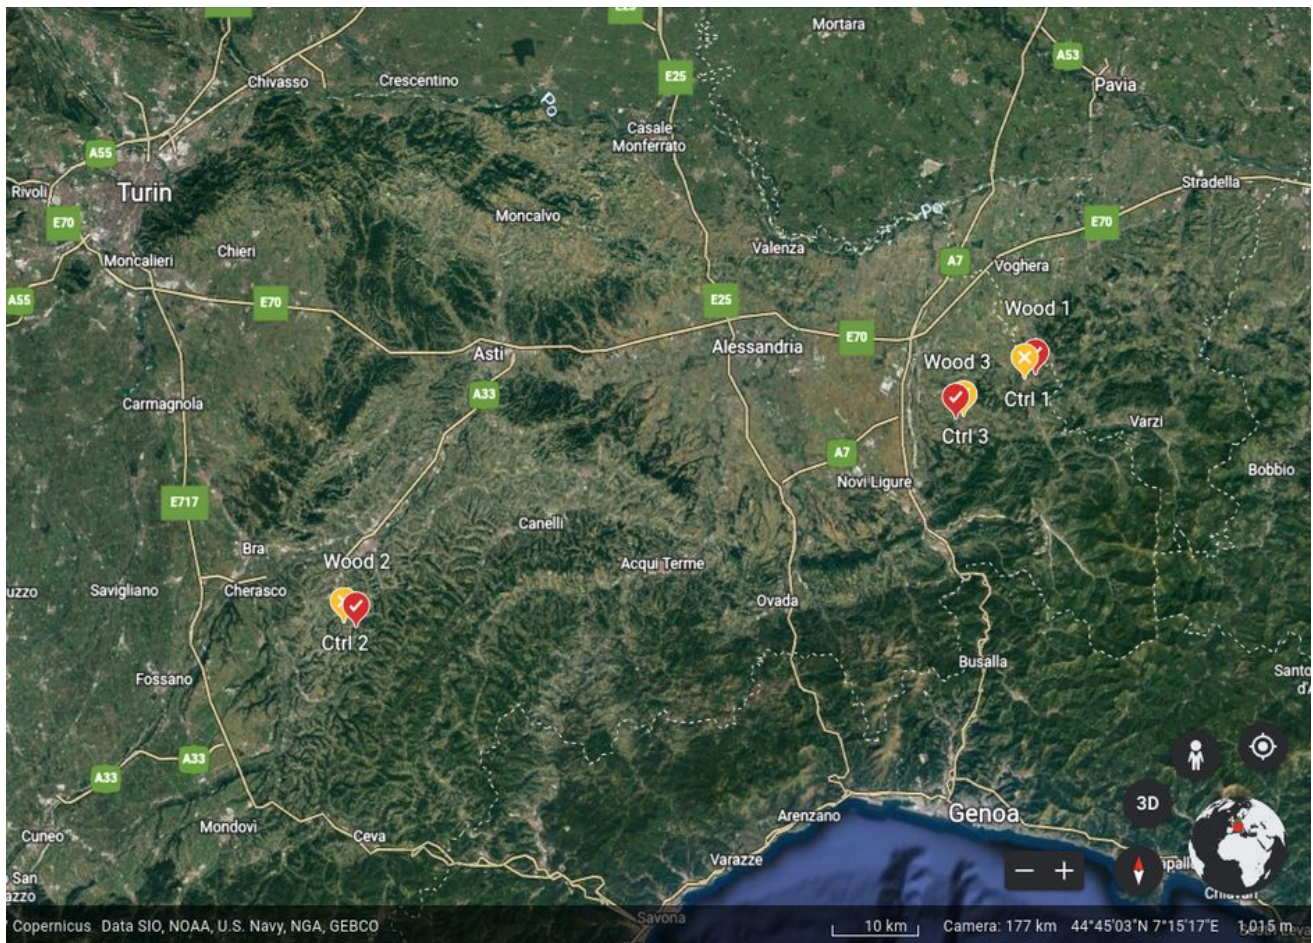

**Supplementary Figure 1. Sampled areas. B)** Land cover (percentages) of the area surrounding (within a 500m radius) the vineyards under investigation and **C)** boxplots comparing the vineyards grouped according to the geographical area. No significant differences were found between the variables in the compared vineyards (Wilcoxon-Mann-Whitney test,  $fdr > 0.05$ ). VC= Vineyards used as the Control; VW= Vineyards close to Woods. “dec. trees”= deciduous trees.

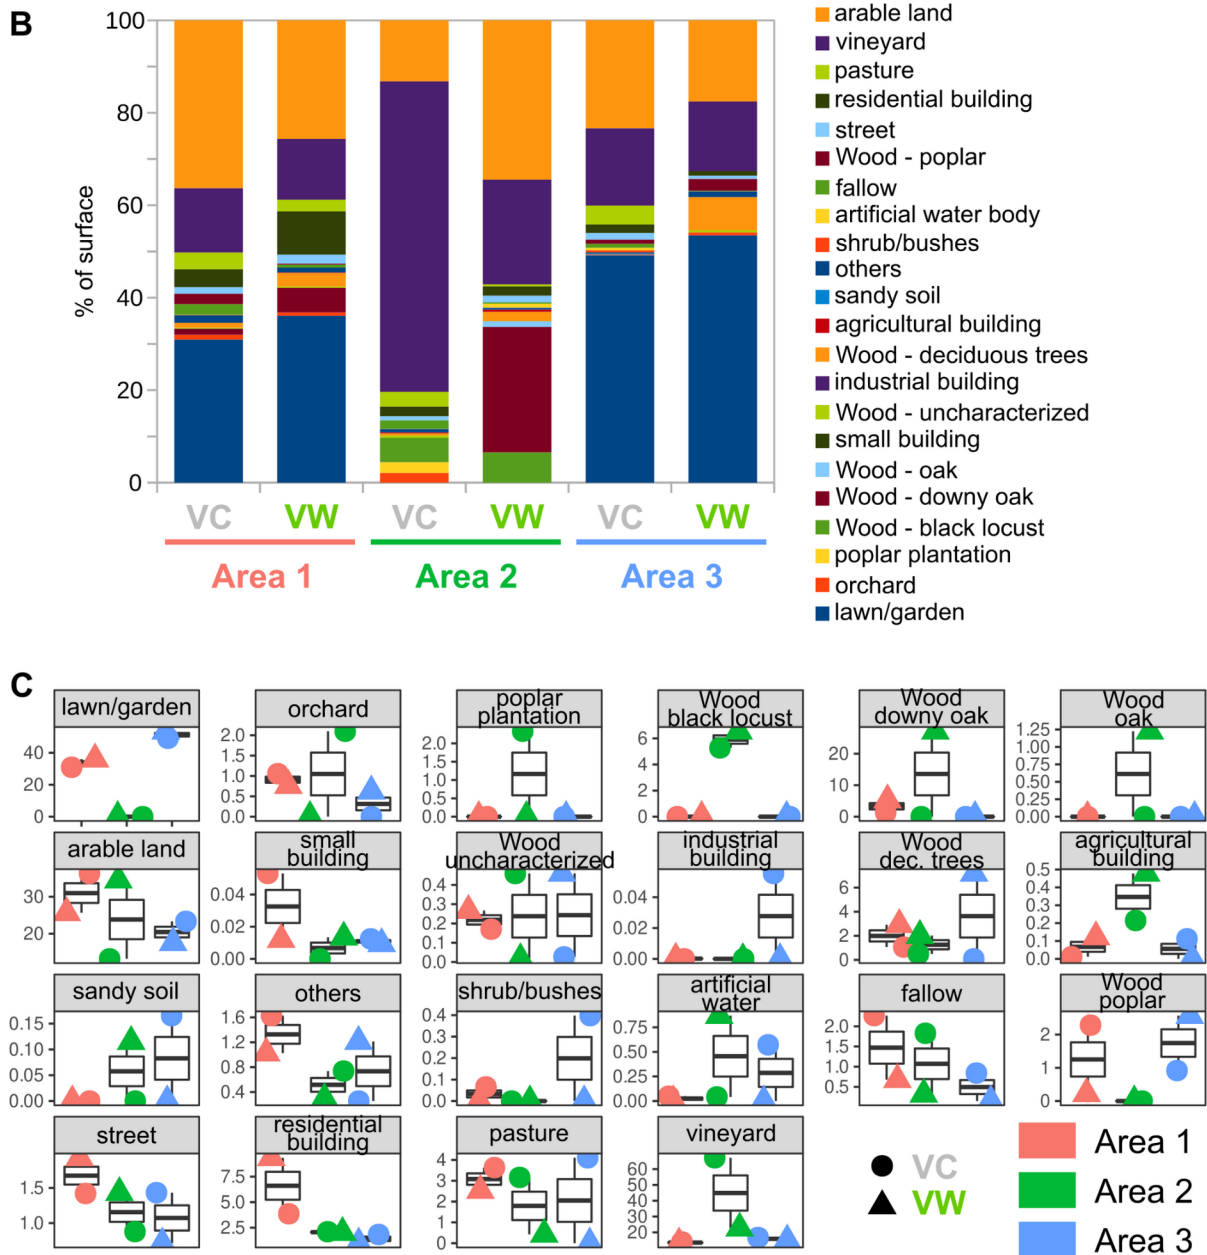

Supplementary Material

**Supplementary Figure 1. Sampled areas. D)** Pedological and topological characteristics of the vineyards under investigation and **E)** boxplots comparing the vineyards grouped according to the geographical area. No significant differences were found between the variables in the compared vineyards (Wilcoxon-Mann-Whitney test,  $fdr > 0.05$ ). VC= Vineyards used as the Control; VW= Vineyards close to Woods.

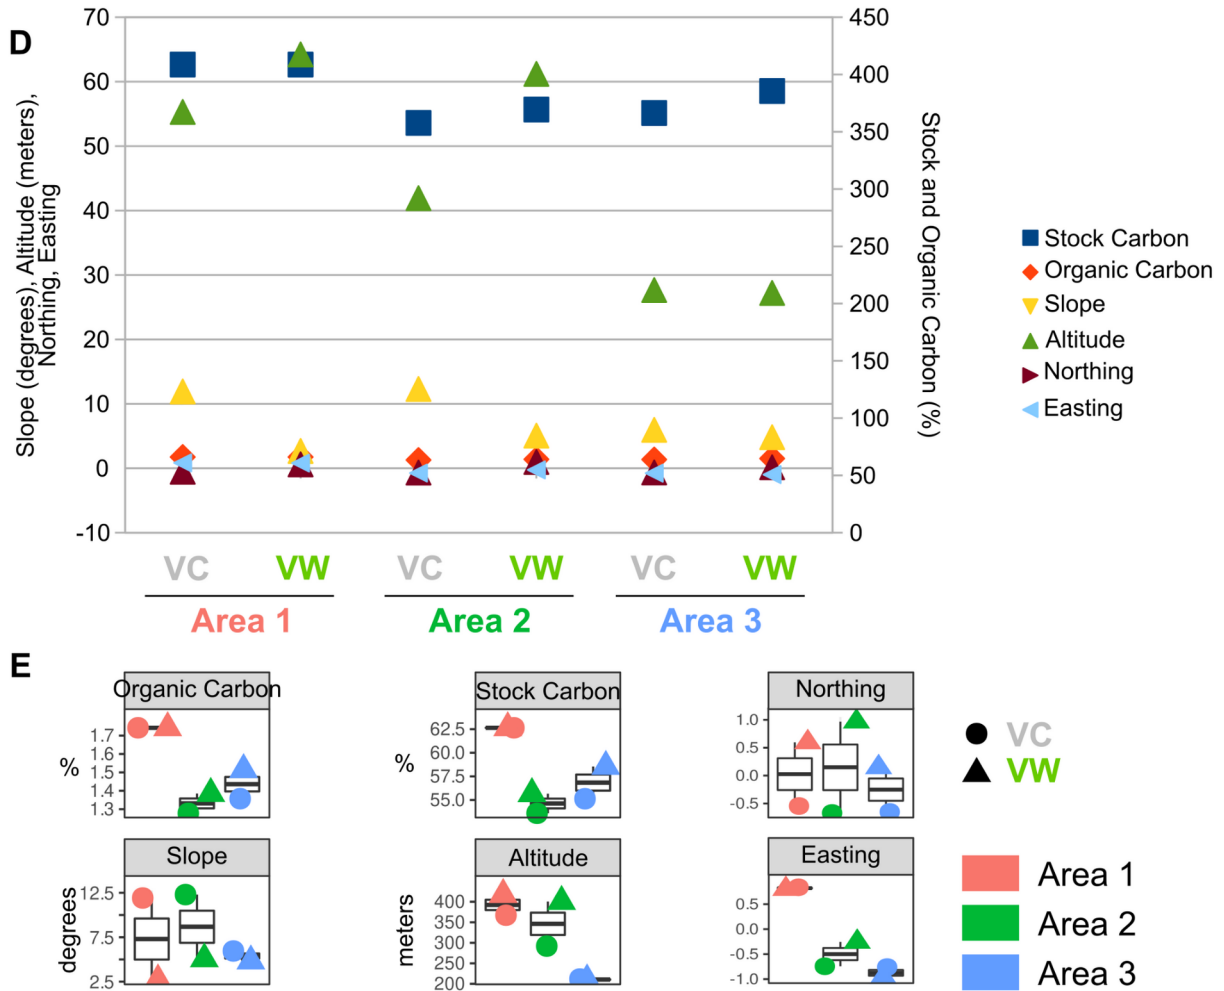



**Supplementary Figure 2. Comparison of yeast abundances observed in insects' guts.** The number CFUs (Colony Forming Units) per insect was compared between insects grouped according to **A)** the area of sampling, **B)** the year of sampling; **C)** the species of the insect; and **D)** the season of sampling. \*Wilcoxon-Mann-Whitney  $\text{fdr} < 0.05$ .

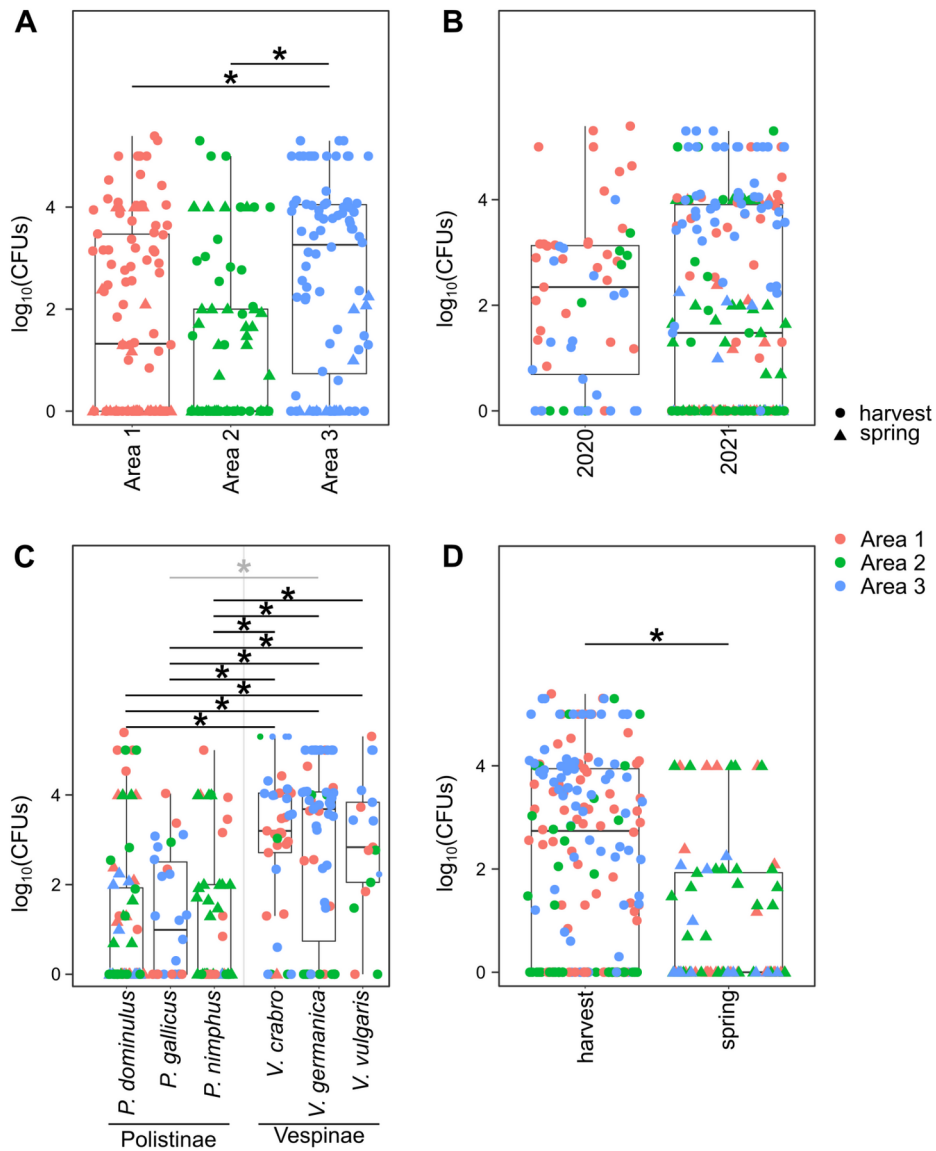

Supplementary Material

**Supplementary Figure 3. Distribution of insects resulting in yeast isolation.** For each group indicated in the y-axis, the black bar indicates the percentage of insects providing yeast isolates, the gray bar indicates the percentage of insects not providing yeast isolates. The numbers written on the bars correspond to the number of insects. IVC= Insects caught in Vineyards used as Controls; IVW= Insects caught in Vineyards close to Woods.

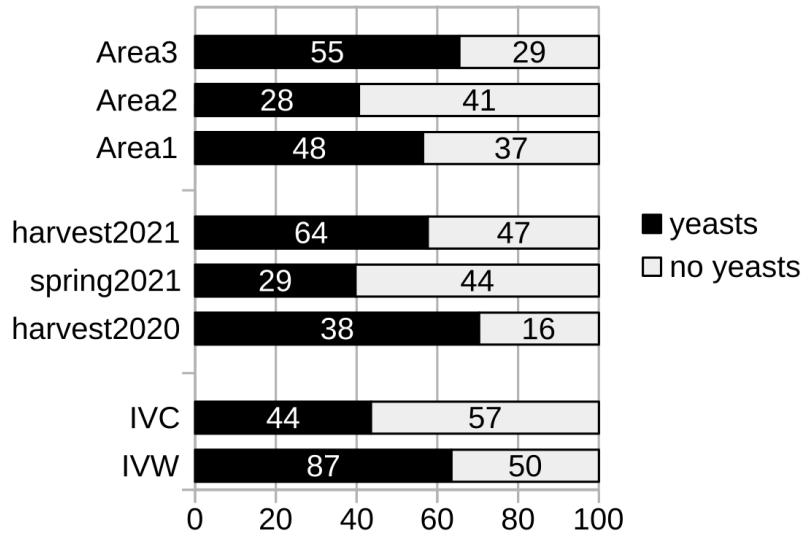

**Supplementary Figure 4. Alpha diversities of yeast populations in insects' guts.** **A)** Comparison of the number of yeast species found in insects grouped according to the collection area. **B)** Comparison of the number of yeast species found in insects grouped according to the time of collection. **C)** Comparison of the number of yeast species found in insects grouped according to the insect species. \* Wilcoxon-Mann-Whitney  $fdr < 0.05$ . IVC= Insects caught in Vineyards used as Controls; IVW= Insects caught in Vineyards close to Woods.

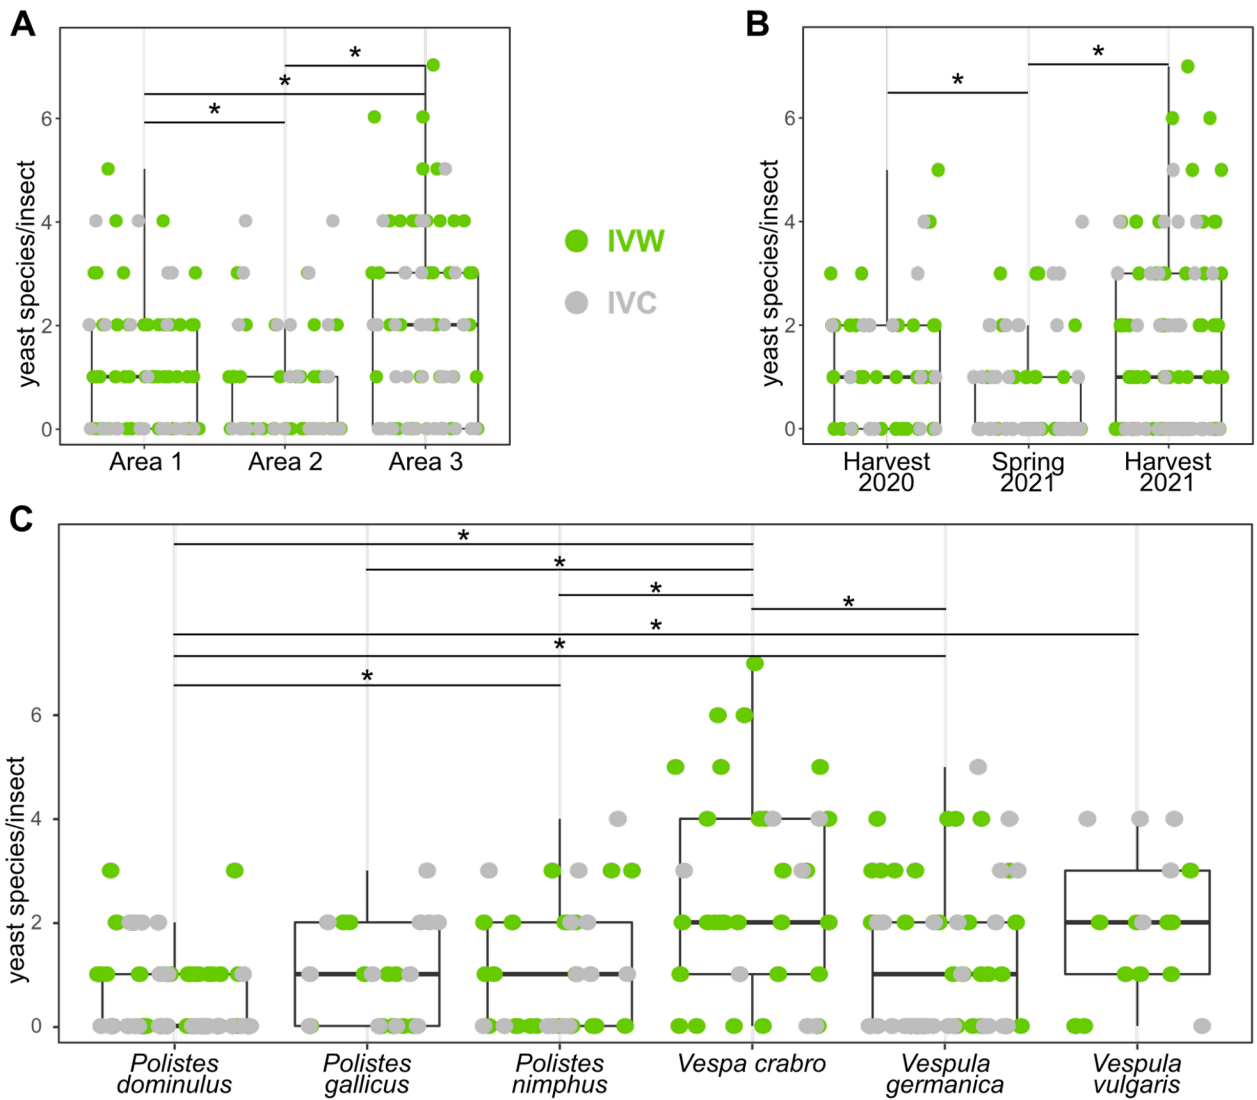

Supplementary Material

**Supplementary Figure 5. PCoA based on Jaccard distances among yeast populations in sampled insects.** First two Coordinates of the PCoA on the Jaccard distances among yeast populations of insects' gut, with samples colored according to **A) the sampling area, B) the year of sampling, and C) the insect species.**

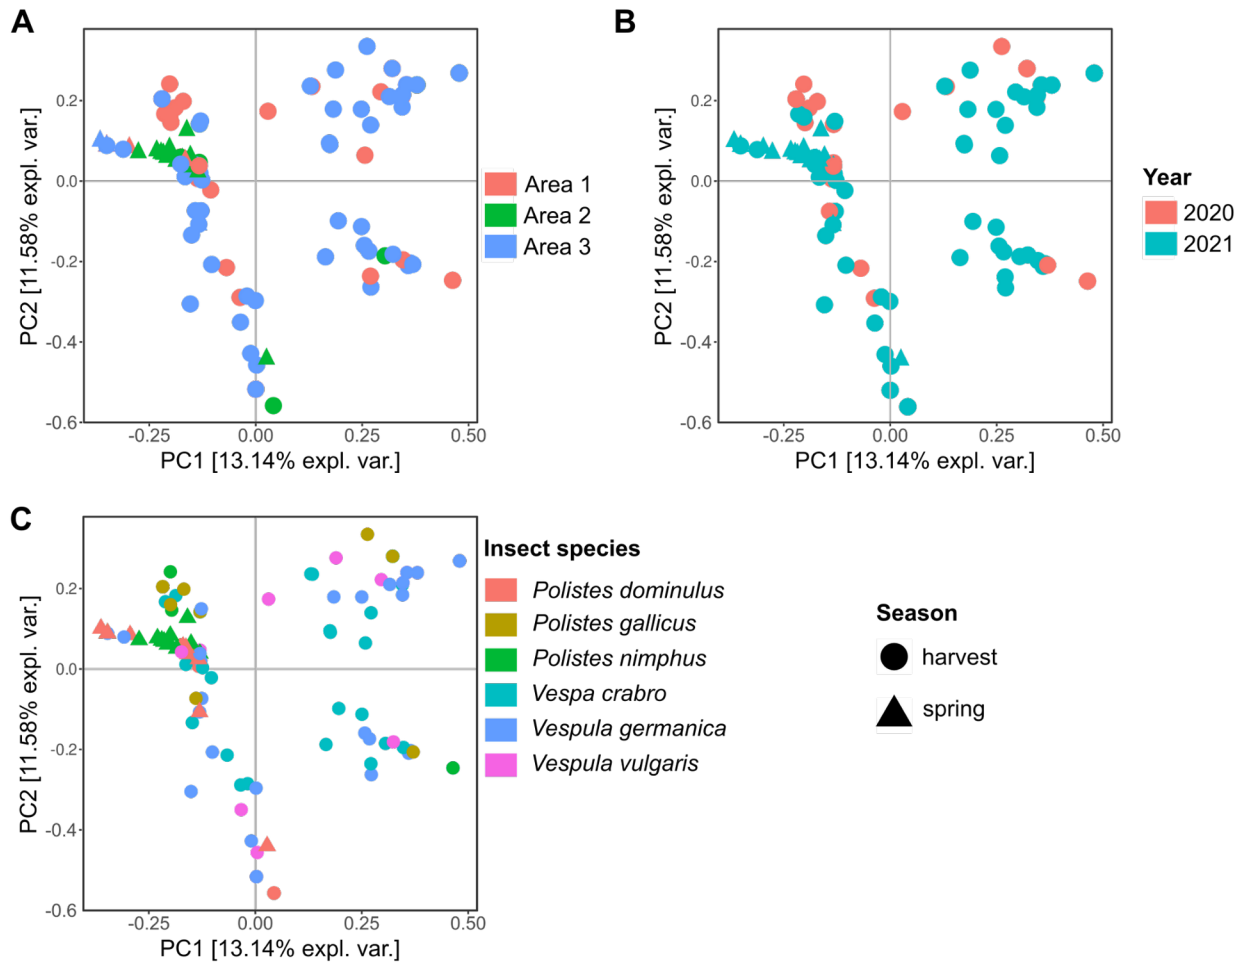



**Supplementary Figure 6. PCoA based on Unifrac distances among yeast populations in sampled insects.** First two Coordinates of the PCoA on the Unifrac distances among yeast populations of insects' gut, with samples colored according to **A)** wood or control insects, **B)** the sampling area, **C)** the year of sampling, and **D)** the insect species. IVC= Insects caught in Vineyards used as Controls; IVW= Insects caught in Vineyards close to Woods.

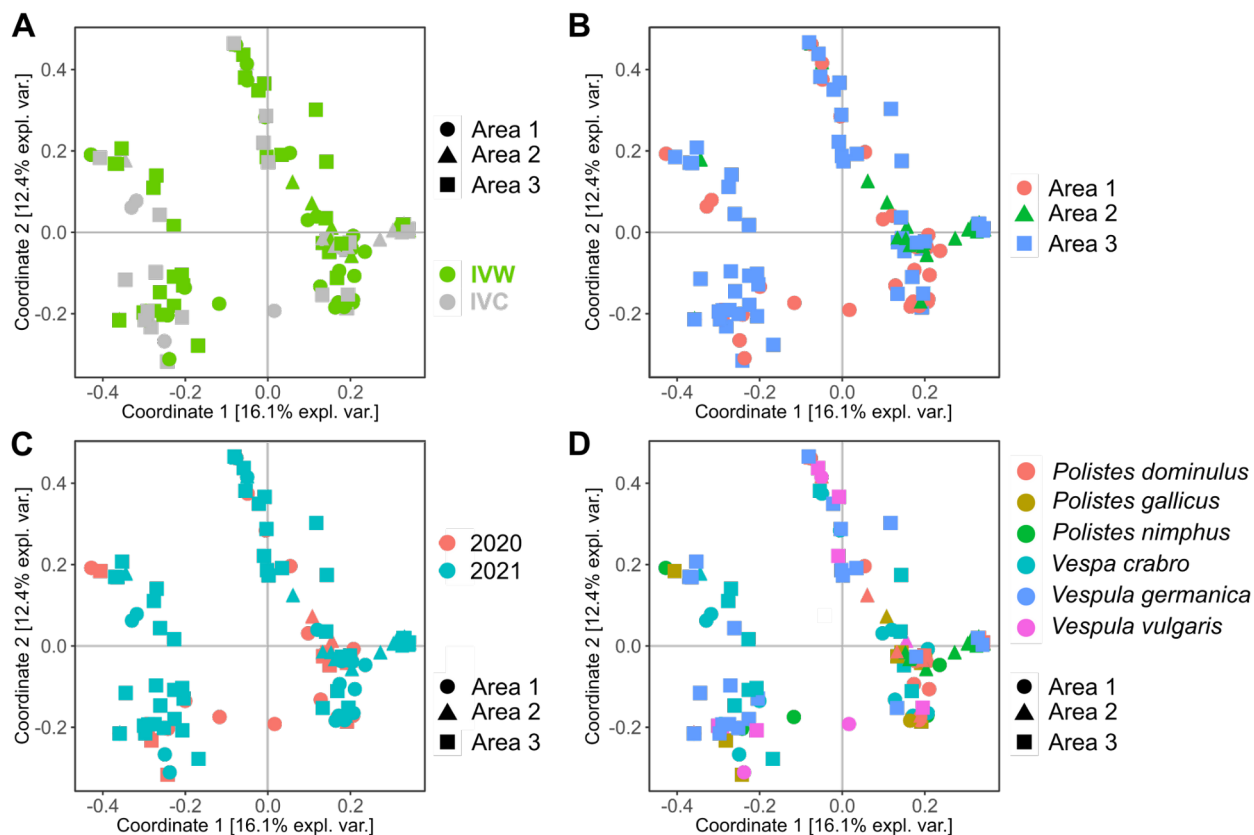

**Supplementary Figure 7. Correlations between the frequency of isolation of yeast species and land cover, topographic, and pedological characteristics of the vineyards and their surrounding areas.** Correlations were assessed by means of Spearman correlation analysis between the frequency of isolation of the yeast species (expressed as the number of insects bearing the yeast species on the total number of analyzed insects) and the land cover, topographic, and pedological information on the vineyards and the area surrounding them (within a 500m radius). Only significant correlations (fdr<0.05) are shown.

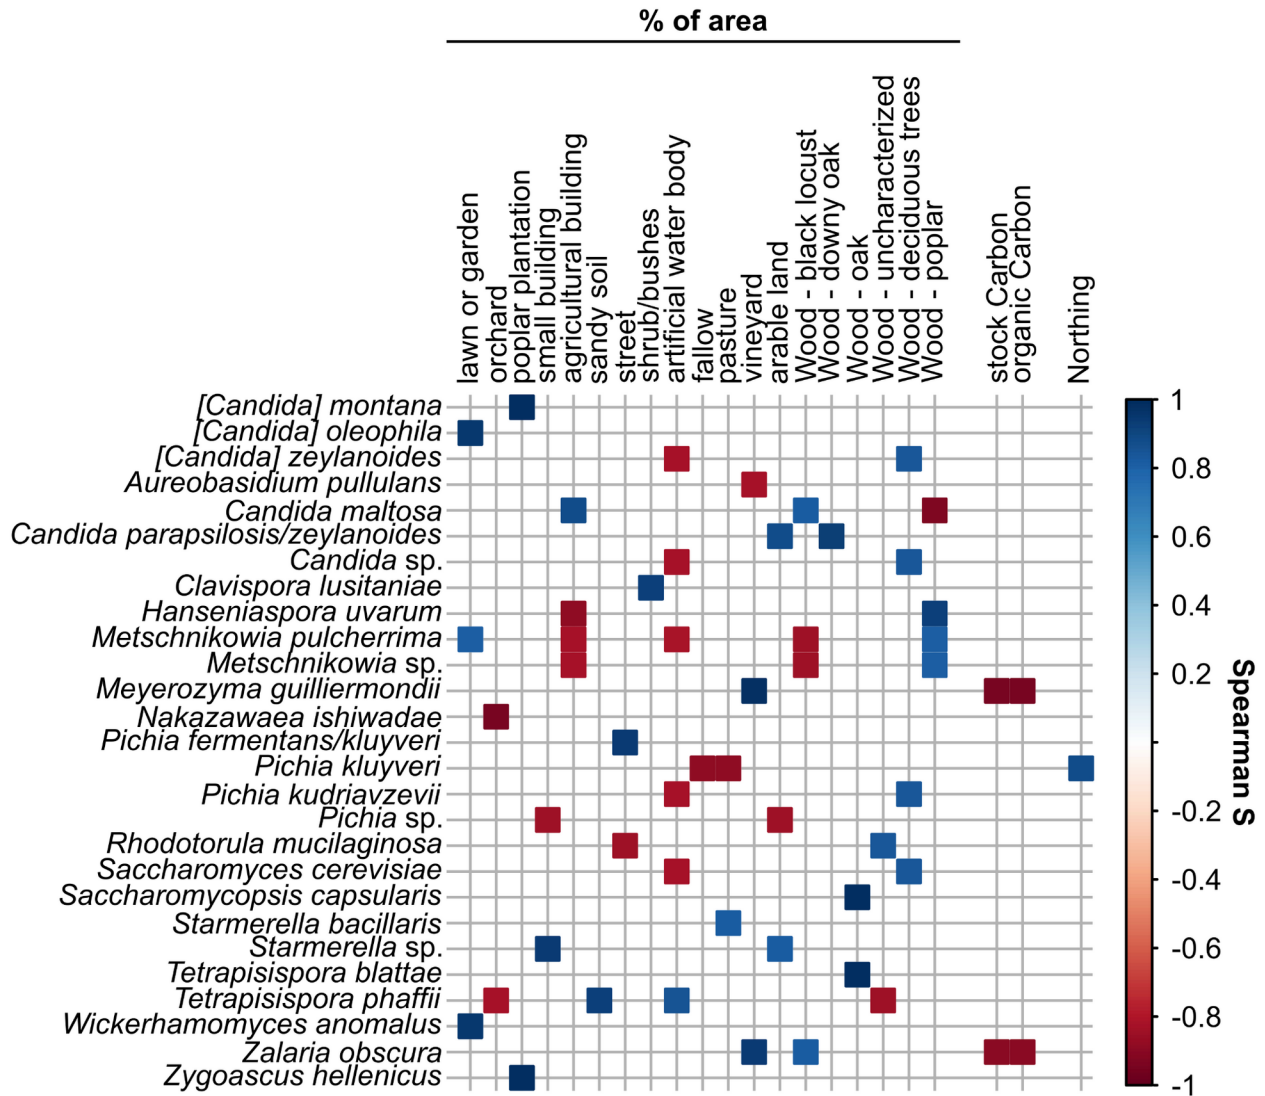

**Supplementary Table 4. Strains used as the representatives of the species for phenotypic tests.** At least one strain for each species isolated in this study was selected as the representative of the species. In the table are reported: the ID of the selected strain (corresponding to the ID reported in **Supplementary Table 3**), the species, the GenBank Accession number of the ITS1 sequence, the group (yIVW- or yIVC- specific, or “core”, as indicated in **Fig. 3**), and the “Species ID” of the strain indicated in the plots reporting the data on growth capabilities (**Fig. 3B**, **Supplementary Figure 8**), and the Cluster number (see Supplementary Figure 10) <sup>a</sup>Square brackets ([ ]) around a genus indicate that the name awaits appropriate action by the research community to be transferred to another genus. yIVC= yeasts belonging to species isolated only from Insects caught in Vineyards used as Controls; yIVW= yeasts belonging to species isolated only from Insects caught in Vineyards close to Woods; core= yeasts belonging to species isolated both from IVW and IVC; wine= strains used as the reference, previously isolated from spontaneous fermentation of grape musts of Area 2.

| Strain_ID    | Species                                | GenBank Access | Group | Species ID | Cluster |
|--------------|----------------------------------------|----------------|-------|------------|---------|
| C_IC_3.2     | <i>Clavispora lusitaniae</i>           | OP663282       | yIVC  | 1          | 5       |
| C_IC_4.2     | <i>Clavispora lusitaniae</i>           |                | yIVC  | 2          | 5       |
| C_TH21_6.4   | <i>Clavispora lusitaniae</i>           |                | yIVC  | 3          | 1       |
| C_TH21_12.1  | <i>Cryptococcus neoformans</i>         | OP663221       | yIVC  | 4          | 1       |
| C_IC_8.3     | <i>Pichia bruneiensis</i>              | OP661215       | yIVC  | 5          | 5       |
| C_IC_8.2     | <i>Saturnispora diversa</i>            |                | yIVC  | 6          | 4       |
| B_TH21_25.1  | <i>[Candida]<sup>a</sup> oleophila</i> | OP663214       | core  | 7          | 1       |
| B_ICS21_15.2 | <i>Aureobasidium pullulans</i>         | OP663268       | core  | 8          | 4       |
| B_ICS21_15.4 | <i>Aureobasidium pullulans</i>         | OP663246       | core  | 9          | 4       |
| B_ICS21_15.5 | <i>Aureobasidium pullulans</i>         | OP663216       | core  | 10         | 4       |
| B_ICS21_15.6 | <i>Aureobasidium pullulans</i>         | OP663217       | core  | 11         | 4       |

|              |                                  |          |      |    |   |
|--------------|----------------------------------|----------|------|----|---|
| B_TH21_24.4  | <i>Aureobasidium pullulans</i>   | OP663215 | core | 12 | 6 |
| C_TS21_9.1   | <i>Aureobasidium pullulans</i>   |          | core | 13 | 6 |
| B_RS21_12.1  | <i>Candida maltosa</i>           |          | core | 14 | 4 |
| B_TH21_19.6  | <i>Candida tropicalis</i>        | OP663220 | core | 15 | 1 |
| B_RH21_12.1  | <i>Hanseniaspora uvarum</i>      | OP663224 | core | 16 | 5 |
| B_TH21_10.4  | <i>Hanseniaspora uvarum</i>      | OP663225 | core | 17 | 1 |
| B_TH21_12.2  | <i>Hanseniaspora uvarum</i>      | OP663223 | core | 18 | 5 |
| B_TH21_12.7  | <i>Hanseniaspora uvarum</i>      | OP663241 | core | 19 | 5 |
| B_TH21_19.2  | <i>Hanseniaspora uvarum</i>      | OP663222 | core | 20 | 2 |
| C_TH21_3.1   | <i>Hanseniaspora uvarum</i>      | OP663249 | core | 21 | 2 |
| C_GH21_1.3   | <i>Lachancea thermotolerans</i>  | OP663227 | core | 22 | 1 |
| B_IC_9.1     | <i>Metschnikowia pulcherrima</i> | OP663251 | core | 23 | 4 |
| B_TH21_2.4   | <i>Metschnikowia pulcherrima</i> | OP663253 | core | 24 | 1 |
| B_IC_19.4    | <i>Metschnikowia sp</i>          | OP663247 | core | 25 | 1 |
| B_ICH21_20.1 | <i>Metschnikowia sp</i>          | OP663265 | core | 26 | 1 |
| B_TH21_18.1  | <i>Metschnikowia sp</i>          | OP663266 | core | 27 | 1 |
| B_TH21_21.1  | <i>Metschnikowia sp</i>          | OP663260 | core | 28 | 1 |
| B_TH21_3.3   | <i>Metschnikowia sp</i>          | OP663286 | core | 29 | 1 |
| B_TH21_6.7   | <i>Metschnikowia sp</i>          | OP663257 | core | 30 | 6 |
| C_GS21_15.1  | <i>Metschnikowia sp</i>          | OP650086 | core | 31 | 1 |
| C_IC_5.1     | <i>Metschnikowia sp</i>          | OP663283 | core | 32 | 5 |
| C_ICH21_1.2  | <i>Metschnikowia sp</i>          | OP663287 | core | 33 | 5 |
| C_ICH21_2.4  | <i>Metschnikowia sp</i>          | OP663274 | core | 34 | 6 |
| C_T_7.1      | <i>Metschnikowia sp</i>          | OP663279 | core | 35 | 5 |
| C_TH21_10.2  | <i>Metschnikowia sp</i>          | OP663258 | core | 36 | 1 |



|             |                                    |          |      |    |   |
|-------------|------------------------------------|----------|------|----|---|
| C_TH21_4.6  | <i>Metschnikowia sp</i>            | OP663288 | core | 37 | 1 |
| C_TH21_8.3  | <i>Metschnikowia sp</i>            | OP663259 | core | 38 | 6 |
| C_TH21_9.2  | <i>Metschnikowia sp</i>            | OP663269 | core | 39 | 1 |
| C_TH21_13.3 | <i>Meyerozyma guilliermondii</i>   | OP663228 | core | 40 | 2 |
| C_TH21_7.1  | <i>Nakazawaea ishiwadae</i>        | OP663261 | core | 41 | 5 |
| B_IC_13.2   | <i>Pichia fermentans/kluuyveri</i> | OP663235 | core | 42 | 6 |
| B_IC_14.1   | <i>Pichia fermentans/kluuyveri</i> | OP663264 | core | 43 | 6 |
| B_IC_16.1   | <i>Pichia fermentans/kluuyveri</i> | OP663271 | core | 44 | 4 |
| B_IC_17.2   | <i>Pichia fermentans/kluuyveri</i> | OP663263 | core | 45 | 6 |
| C_T_5.1     | <i>Pichia fermentans/kluuyveri</i> | OP663280 | core | 46 | 6 |
| B_TH21_20.3 | <i>Pichia sp</i>                   | OP663273 | core | 47 | 4 |
| B_TH21_7.6  | <i>Pichia sp</i>                   | OP663267 | core | 48 | 1 |
| B_TH21_8.5  | <i>Pichia sp</i>                   |          | core | 49 | 1 |
| C_GH21_1.6  | <i>Pichia sp</i>                   | OP663238 | core | 50 | 1 |
| B_TH21_21.2 | <i>Rhodotorula mucilaginosa</i>    | OP663239 | core | 51 | 3 |
| B_IC_13.4   | <i>Starmerella bacillaris</i>      | OP663275 | core | 52 | 5 |
| B_IC_14.2   | <i>Starmerella bacillaris</i>      | OP663276 | core | 53 | 5 |
| B_IC_4.5    | <i>Starmerella bacillaris</i>      | OP663256 | core | 54 | 5 |
| B_IC_8.1    | <i>Starmerella bacillaris</i>      | OP663281 | core | 55 | 5 |
| B_IC_9.2    | <i>Starmerella bacillaris</i>      | OP663277 | core | 56 | 5 |
| B_ICH21_3.2 | <i>Starmerella bacillaris</i>      | OP663232 | core | 57 | 1 |
| C_IC_5.2    | <i>Starmerella bacillaris</i>      | OP663284 | core | 58 | 5 |
| C_IC_6.1    | <i>Starmerella bacillaris</i>      | OP663278 | core | 59 | 5 |
| B_RH21_8.4  | <i>Starmerella cellae</i>          | OP663213 | core | 60 | 6 |
| B_ICH21_1.2 | <i>Starmerella sp</i>              | OP663272 | core | 61 | 5 |
| B_R_8.4     | <i>Starmerella sp</i>              | OP650085 | core | 62 | 5 |

|             |                                              |          |      |    |   |
|-------------|----------------------------------------------|----------|------|----|---|
| B_TH21_10.8 | <i>Starmerella sp</i>                        | OP650088 | core | 63 | 6 |
| C_ICH21_1.3 | <i>Starmerella sp</i>                        |          | core | 64 | 6 |
| C_ICH21_3.2 | <i>Starmerella sp</i>                        | OP663248 | core | 65 | 6 |
| C_TH21_10.5 | <i>Starmerella sp</i>                        |          | core | 66 | 6 |
| C_TH21_13.2 | <i>Starmerella sp</i>                        |          | core | 67 | 5 |
| C_TH21_15.2 | <i>Starmerella sp</i>                        |          | core | 68 | 1 |
| B_IC_6.4    | <i>Wickerhamomyces anomalus</i>              |          | core | 69 | 6 |
| B_TH21_17.1 | <i>Wickerhamomyces anomalus</i>              | OP663230 | core | 70 | 1 |
| B_TH21_5.1  | <i>Wickerhamomyces anomalus</i>              | OP663231 | core | 71 | 1 |
| B_RS21_2.1  | <i>Zalaria obscura</i>                       | OP663255 | core | 72 | 4 |
| C_GS21_15.2 | <i>Zalaria obscura</i>                       | OP650087 | core | 73 | 1 |
| BARBM16.3   | <i>Nakazawaea sp</i>                         | OP663289 | wine | 74 | 5 |
| BARBM_16.1  | <i>Saccharomyces cerevisiae</i>              | OP663244 | wine | 75 | 5 |
| BARBM_16.4  | <i>Saccharomyces cerevisiae</i>              | OP663245 | wine | 76 | 5 |
| BARBM16.2   | <i>Saccharomyces cerevisiae</i>              | OP663242 | wine | 77 | 5 |
| B_TH21_2.3  | <i>[Candida]<sup>a</sup> membranifaciens</i> | OP663212 | yIVW | 78 | 1 |
| B_IC_7.3    | <i>[Candida]<sup>a</sup> zeylanoides</i>     |          | yIVW | 79 | 6 |
| B_T_9.3     | <i>[Candida]<sup>a</sup> zeylanoides</i>     |          | yIVW | 80 | 4 |
| B_IC_6.5    | <i>Ambrosiozyma angophorae</i>               |          | yIVW | 81 | 5 |
| B_TH21_7.4  | <i>Candida norvegica</i>                     | OP663218 | yIVW | 82 | 2 |
| B_ICH21_2.2 | <i>Candida sp</i>                            |          | yIVW | 83 | 6 |
| B_TH21_1.2  | <i>Candida sp</i>                            | OP663219 | yIVW | 84 | 6 |
| B_TH21_12.4 | <i>Candida sp</i>                            |          | yIVW | 85 | 5 |
| B_TH21_21.3 | <i>Candida sp</i>                            |          | yIVW | 86 | 6 |
| B_TH21_28.1 | <i>Candida sp</i>                            |          | yIVW | 87 | 5 |
| B_TH21_29.1 | <i>Candida sp</i>                            | OP663285 | yIVW | 88 | 6 |

|             |                                   |          |      |     |   |
|-------------|-----------------------------------|----------|------|-----|---|
| B_TH21_3.2  | <i>Candida sp</i>                 |          | yIVW | 89  | 1 |
| B_TH21_4.4  | <i>Candida sp</i>                 |          | yIVW | 90  | 6 |
| B_TH21_6.4  | <i>Candida sp</i>                 | OP663250 | yIVW | 91  | 6 |
| B_IC_8.2    | <i>Hanseniaspora valbyensis</i>   |          | yIVW | 92  | 5 |
| B_TH21_11.4 | <i>Lachancea kluyveri</i>         | OP663226 | yIVW | 93  | 5 |
| B_T_6.1     | <i>Nakazawaea wickerhamii</i>     | OP663262 | yIVW | 94  | 6 |
| B_TH21_4.3  | <i>Pichia kluyveri</i>            | OP663236 | yIVW | 95  | 1 |
| B_IC_9.6    | <i>Pichia kudriavzevii</i>        | OP663252 | yIVW | 96  | 6 |
| B_TH21_8.2  | <i>Pichia kudriavzevii</i>        | OP663237 | yIVW | 97  | 5 |
| B_IC_6.2    | <i>Saccharomyces cerevisiae</i>   | OP663243 | yIVW | 98  | 5 |
| B_TH21_11.2 | <i>Saccharomyces cerevisiae</i>   | OP663240 | yIVW | 99  | 5 |
| B_TH21_12.1 | <i>Saccharomyces cerevisiae</i>   | OP663233 | yIVW | 100 | 1 |
| B_TH21_24.1 | <i>Saccharomyces cerevisiae</i>   | OP663234 | yIVW | 101 | 5 |
| B_IC_2.3    | <i>Saccharomycodes ludwigii</i>   |          | yIVW | 102 | 5 |
| B_IC_9.3    | <i>Saccharomycodes ludwigii</i>   | OP663270 | yIVW | 103 | 5 |
| B_TH21_15.1 | <i>Wickerhamomyces canadensis</i> | OP663229 | yIVW | 104 | 6 |
| B_TH21_5.2  | <i>Wickerhamomyces sp</i>         |          | yIVW | 105 | 2 |
| B_TH21_9.3  | <i>Wickerhamomyces sp</i>         | OP663254 | yIVW | 106 | 1 |
| B_IC_4.4    | <i>Zygosaccharomyces bailii</i>   |          | yIVW | 107 | 5 |

**Supplementary Figure 8. Growth capabilities of yeast species isolated from the intestine of the analyzed insects.** The growth capabilities of the strains, selected as representative of every yeast species isolated in this study, were tested in three independent biological replicates. **A-B)** growth rates in the rich medium YP (1% Yeast extract, 2% Peptone) supplemented with 2% arabinose or **C-D)** supplemented with 2% sucrose; growth rates in the minimum medium YNB (Yeast Nitrogen Base) without **(E-F)** and with **(G-H)** the supplementation of amino acids. The Optical Density (OD) of the strain culture was measured at 24h and 48h after the inoculum. The plots report the average ratio calculated as the OD of the yeast culture in the tested medium divided by the OD of the yeast culture in YPD (YP supplemented with 2% glucose). Error bars indicate the standard error. Three *Saccharomyces cerevisiae* and one *Nakazawaea* sp. strains isolated from spontaneous fermentations carried out on the musts from the vineyard of Area 2 were used as references. To improve the clarity of the plot, the strains are indicated with the ID reported in [Supplementary Table 4](#), rather than with the isolate ID or the species name. Bars are colored according to the group of strains/species as indicated in [Supplementary Table 4](#) and **Figure 3**.



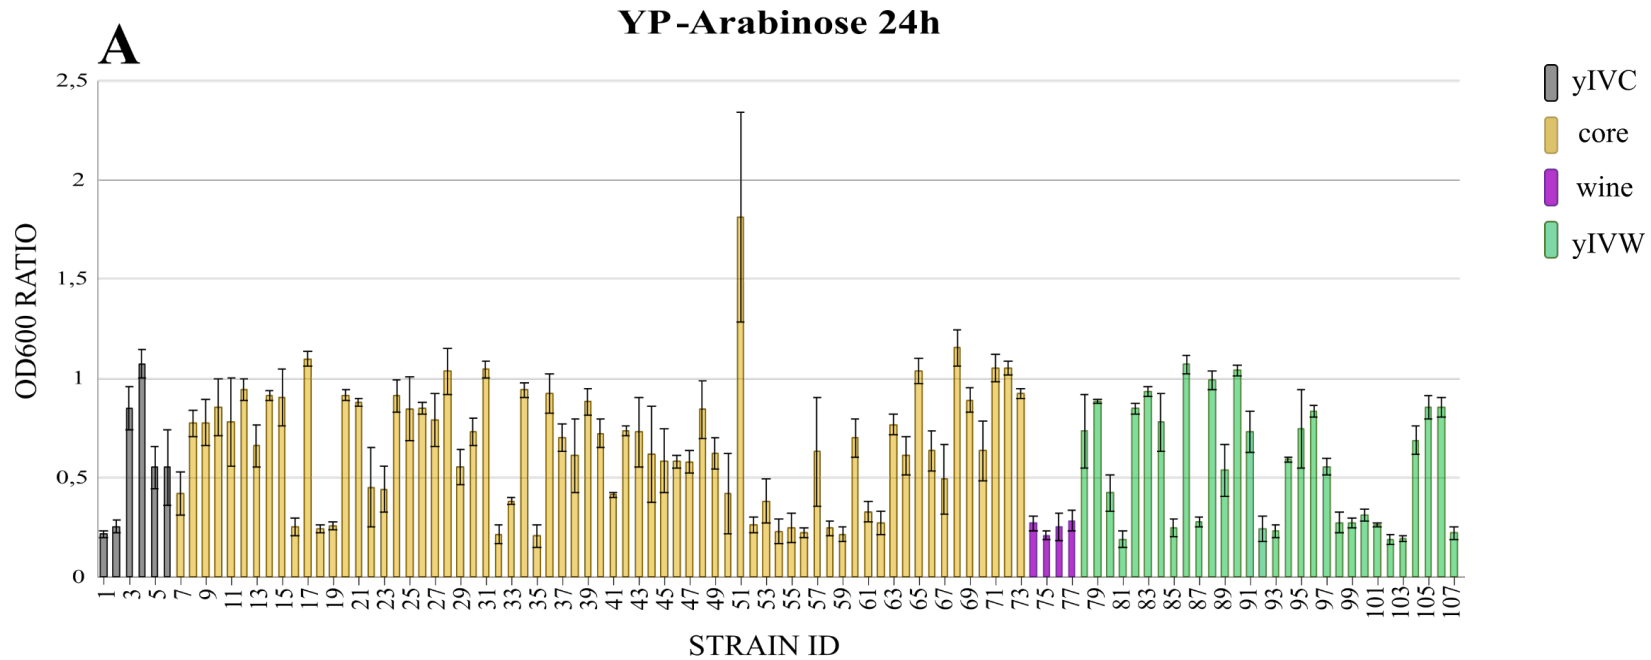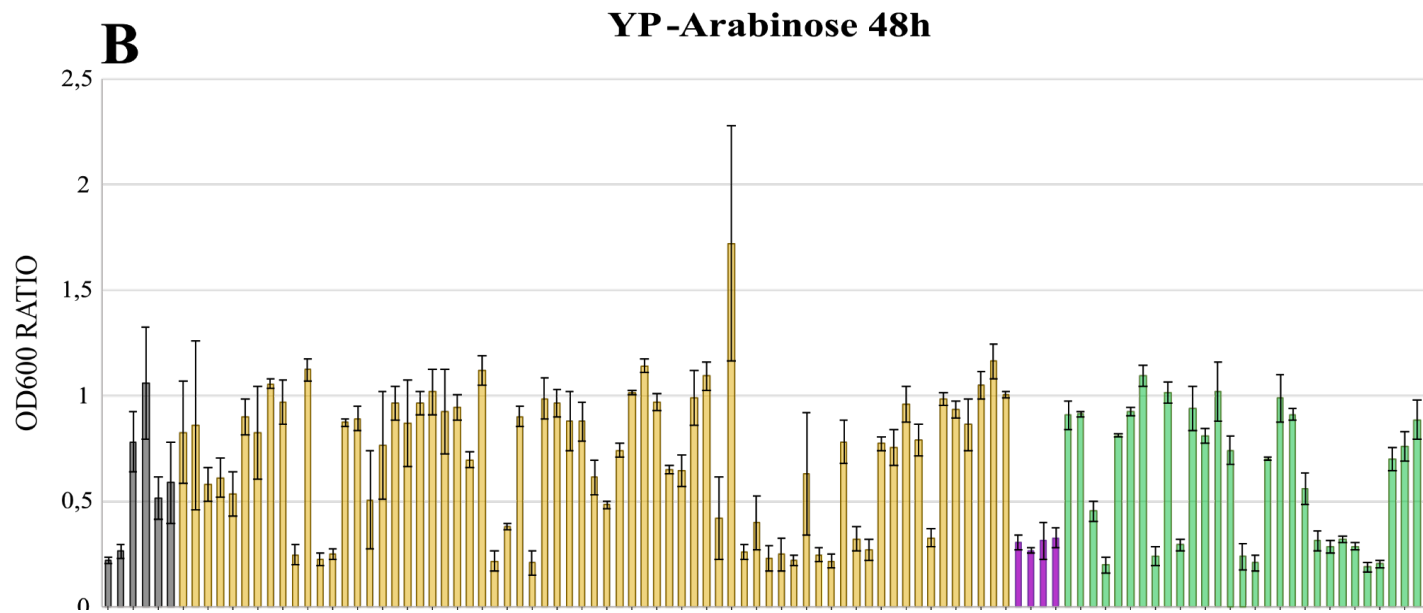

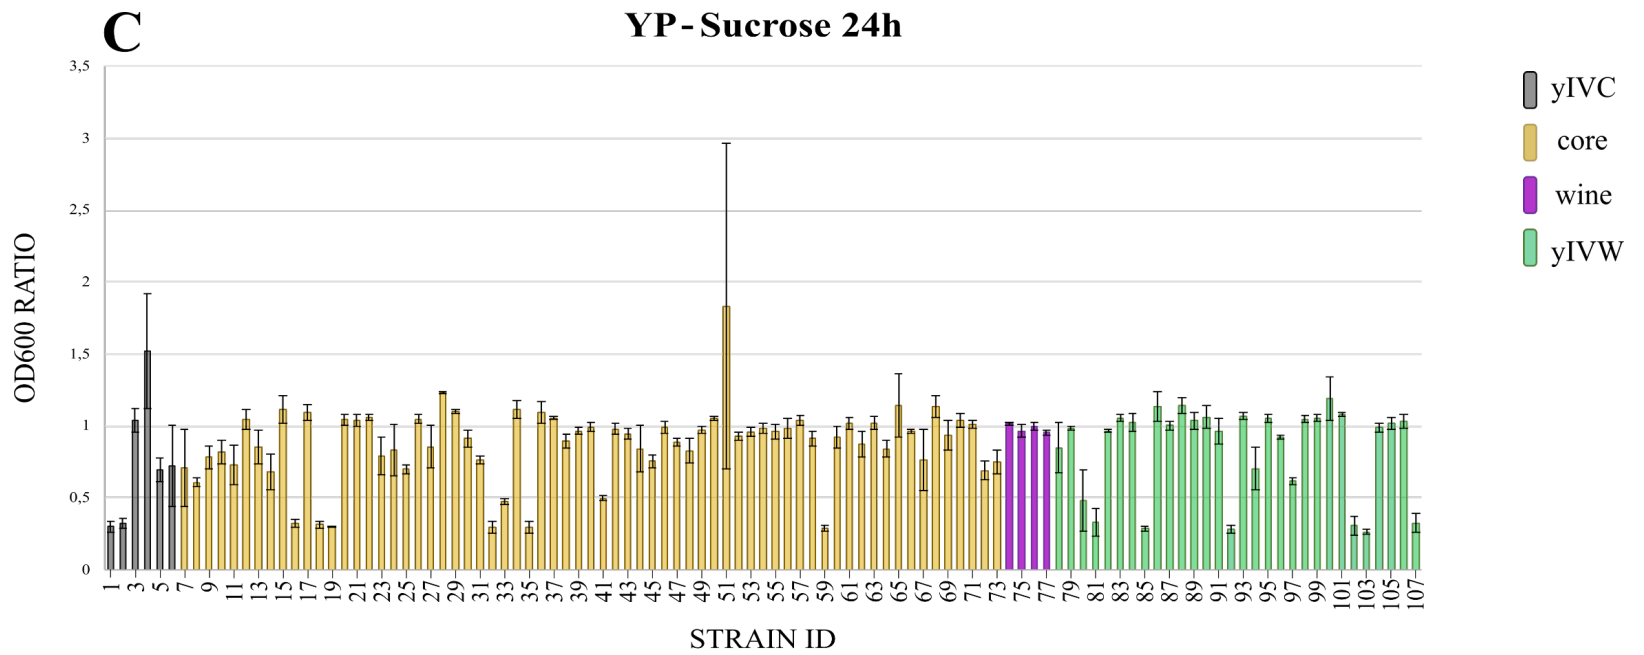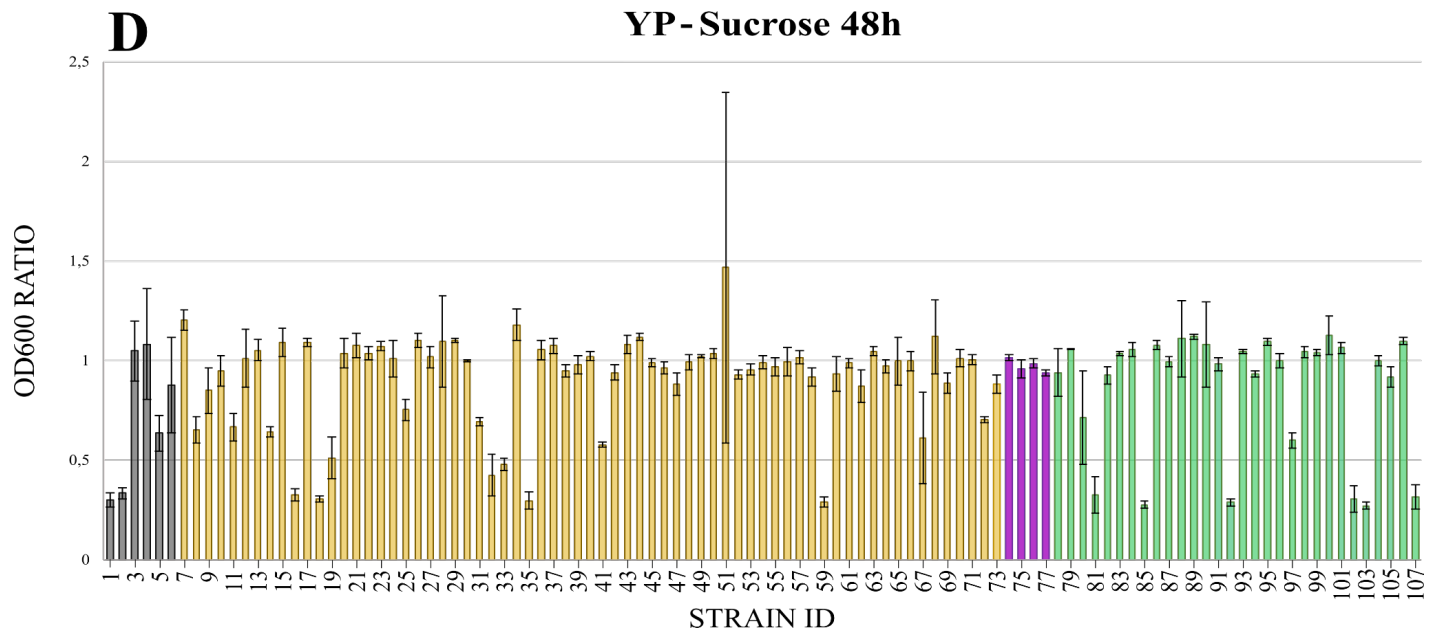

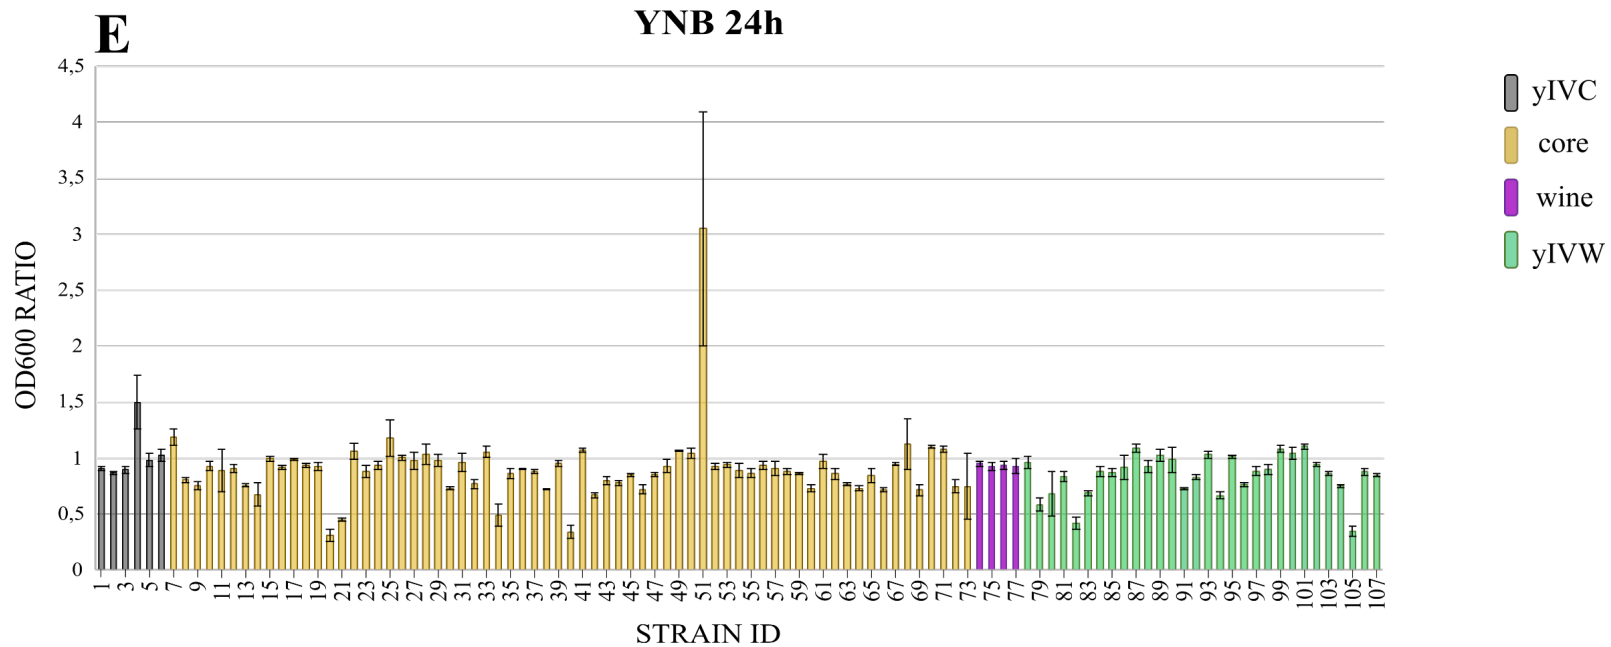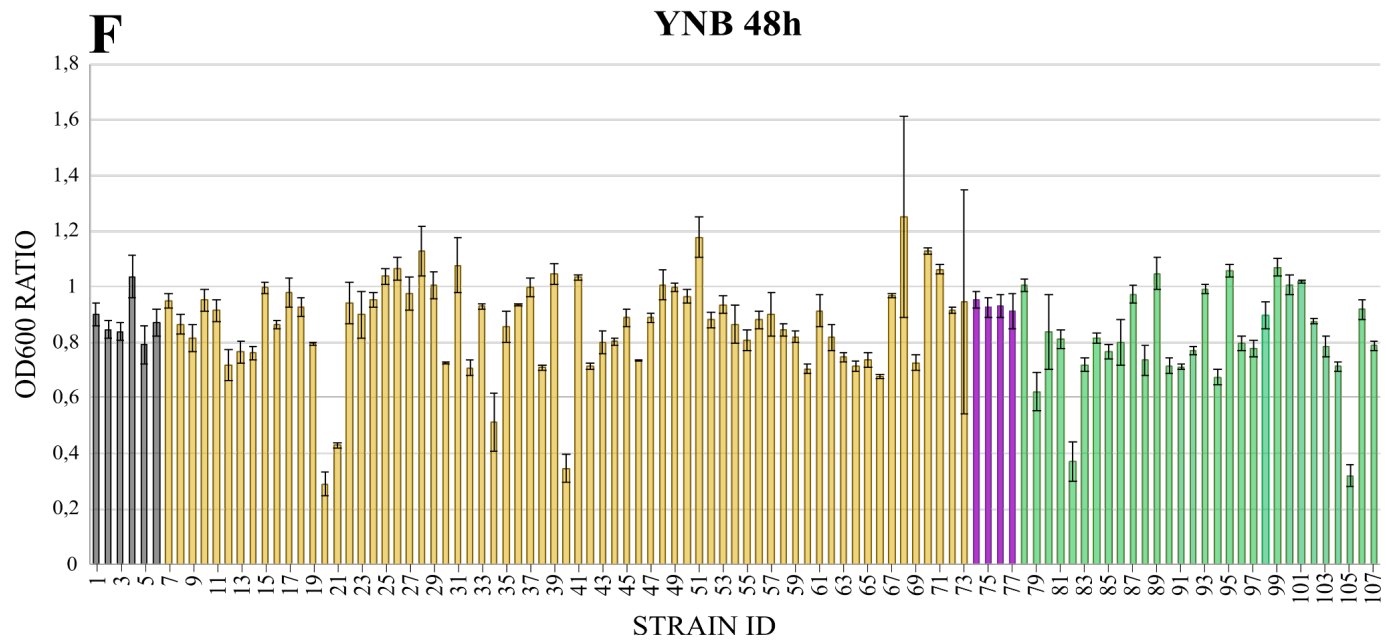

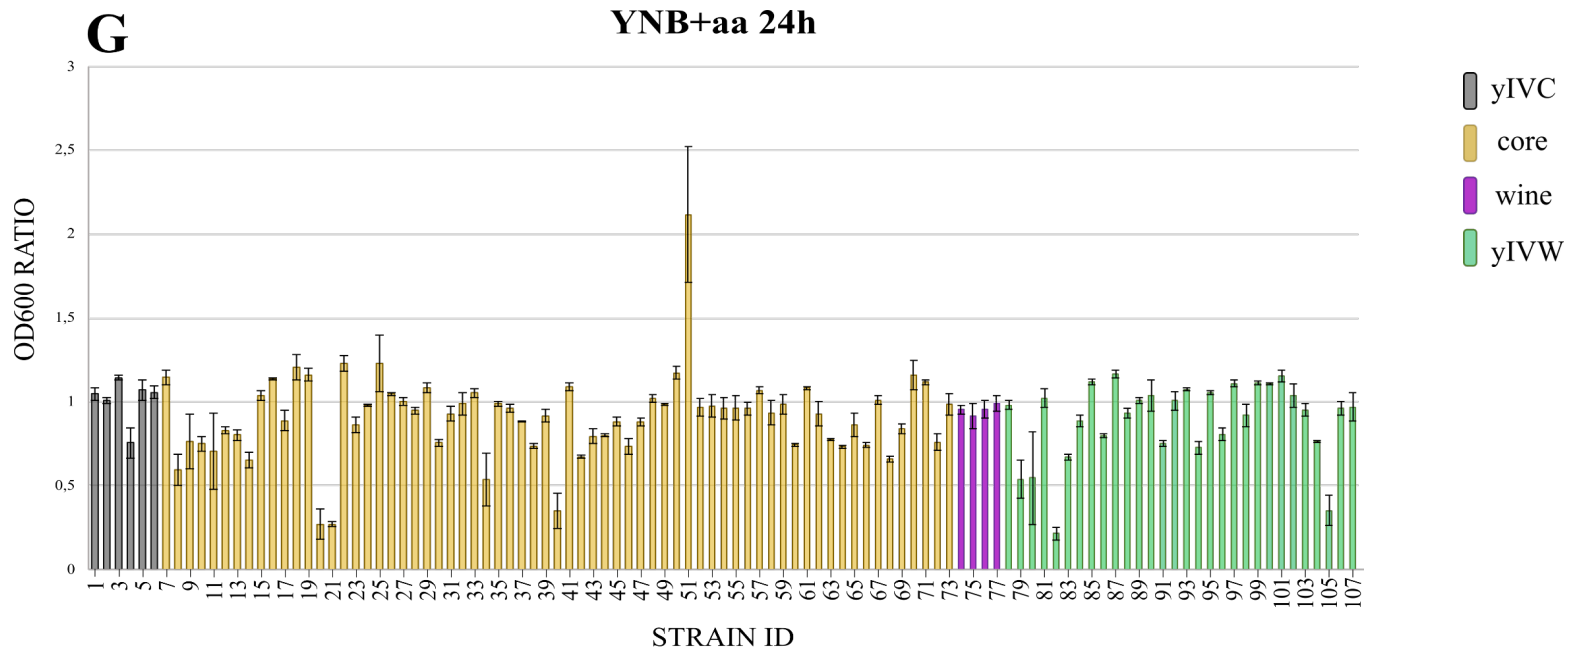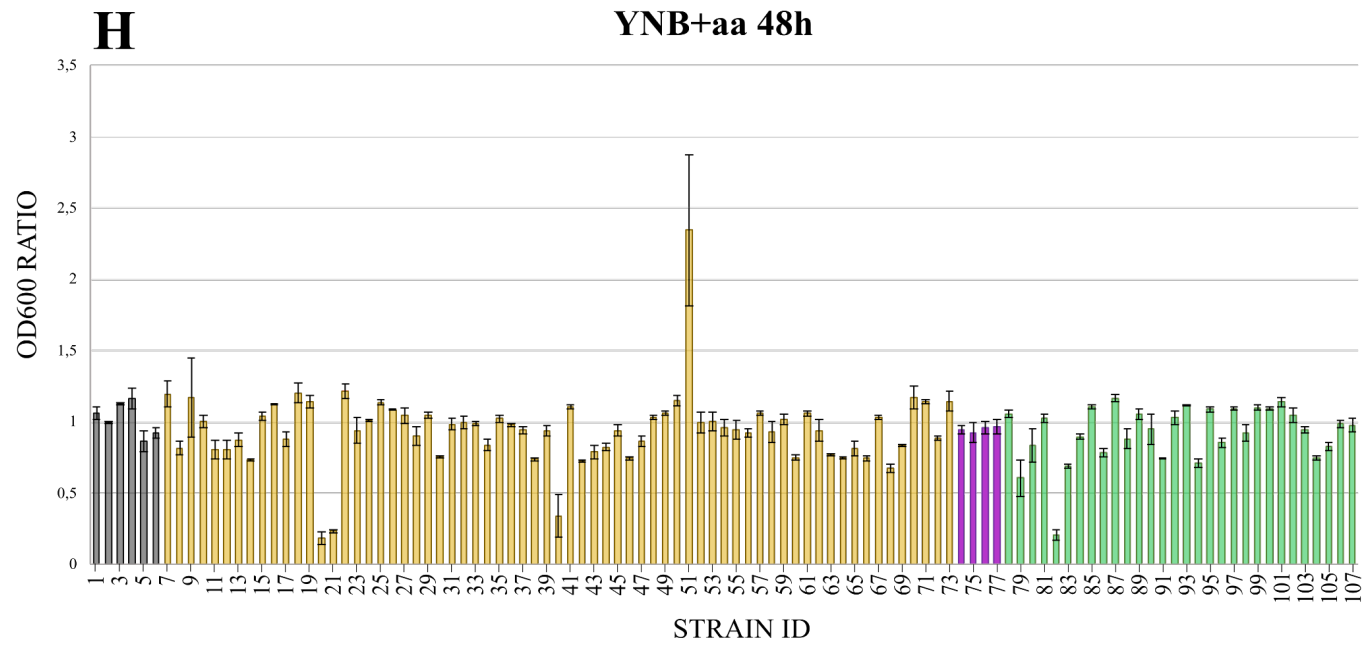

**Supplementary Figure 9: Comparison of the growth ratio of strains grouped according to the species.** The growth ratio was calculated as the OD of the yeast culture in the tested medium divided by the OD of the yeast culture in YPD (YP supplemented with 2% glucose). The letters on top of the points and boxplots indicate the yeast species showing significantly different growth capabilities compared to the indicated species in the medium reported in the plot label. **A-B)** growth rates in the rich medium YP (1% Yeast extract, 2% Peptone) supplemented with 2% arabinose or **C-D)** supplemented with 2% sucrose; growth rates in the minimum medium YNB (Yeast Nitrogen Base)

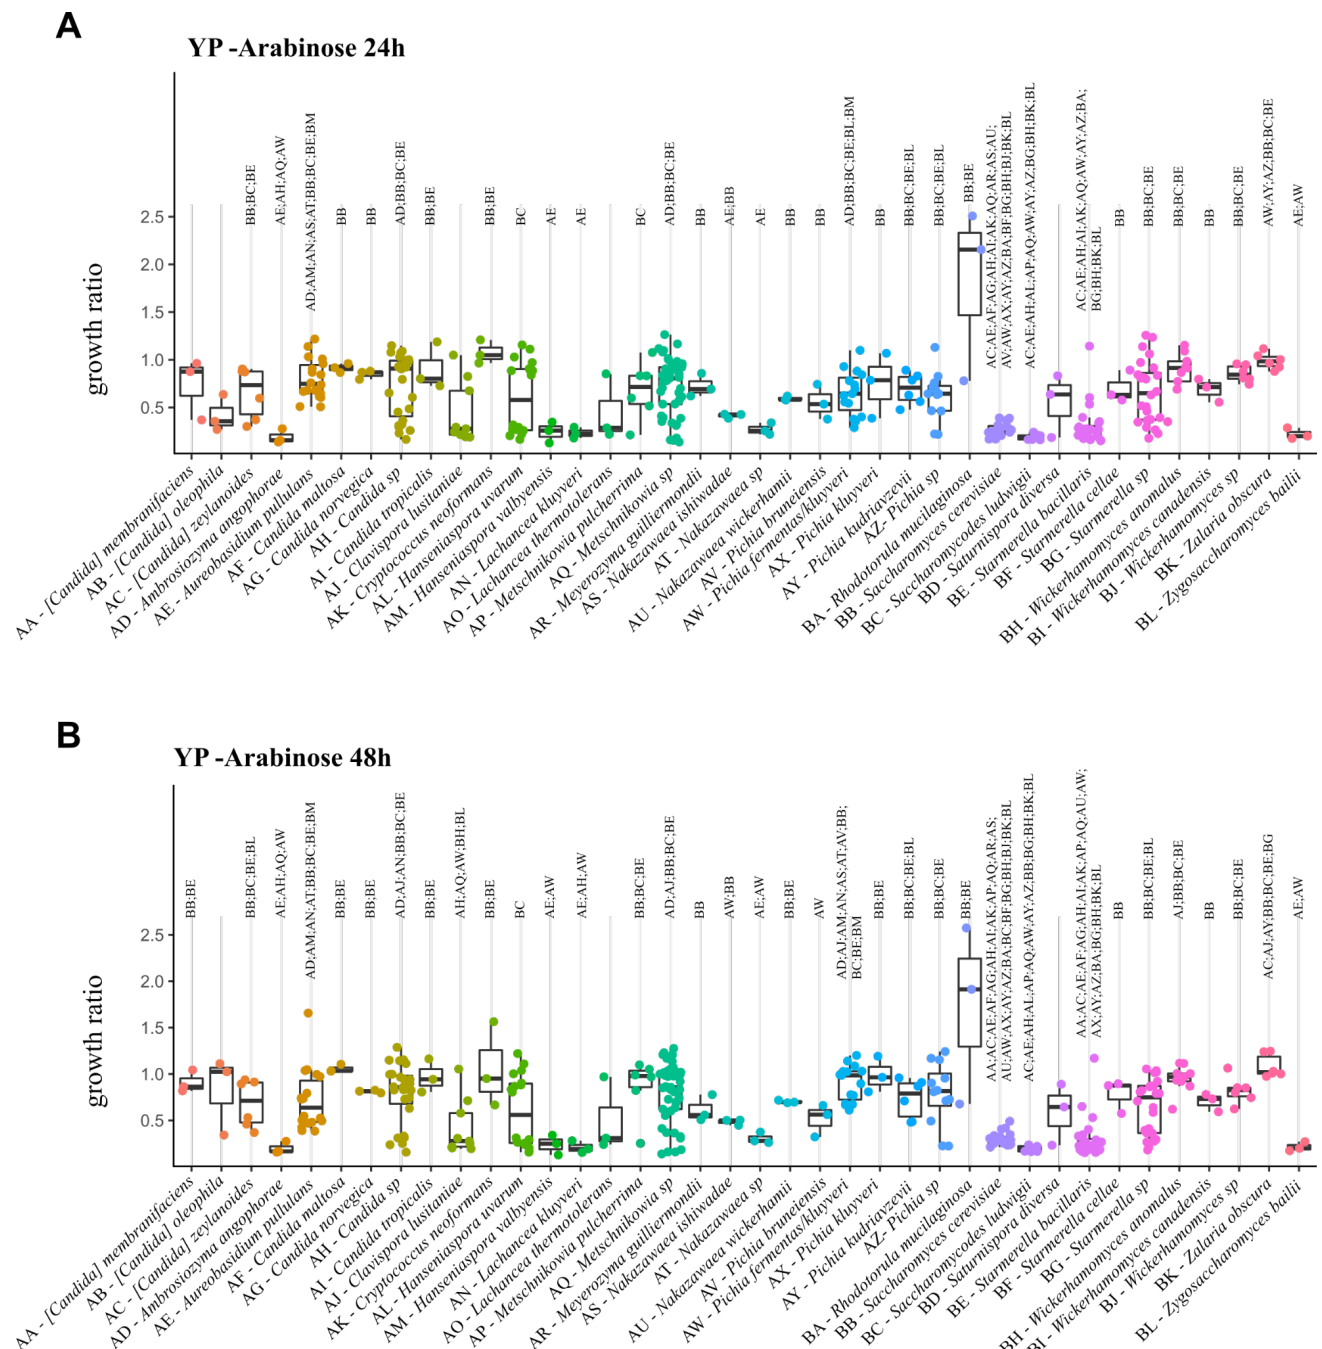

without (E-F) and with (G-H) the supplementation of amino acids.

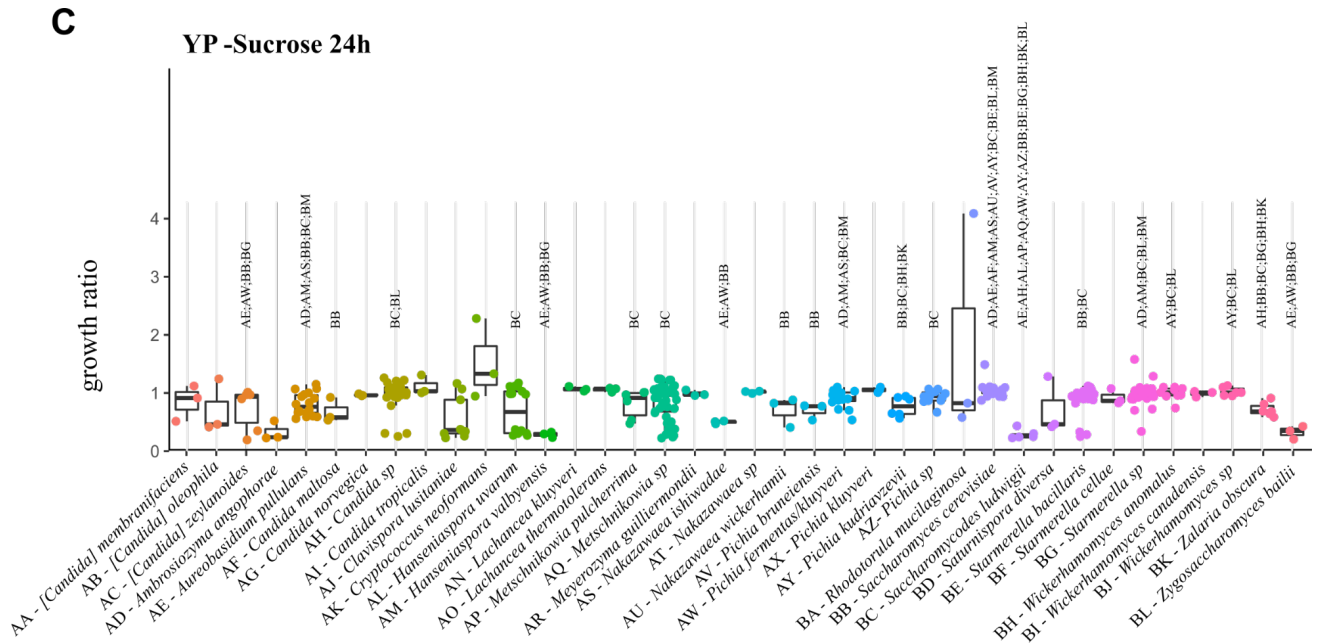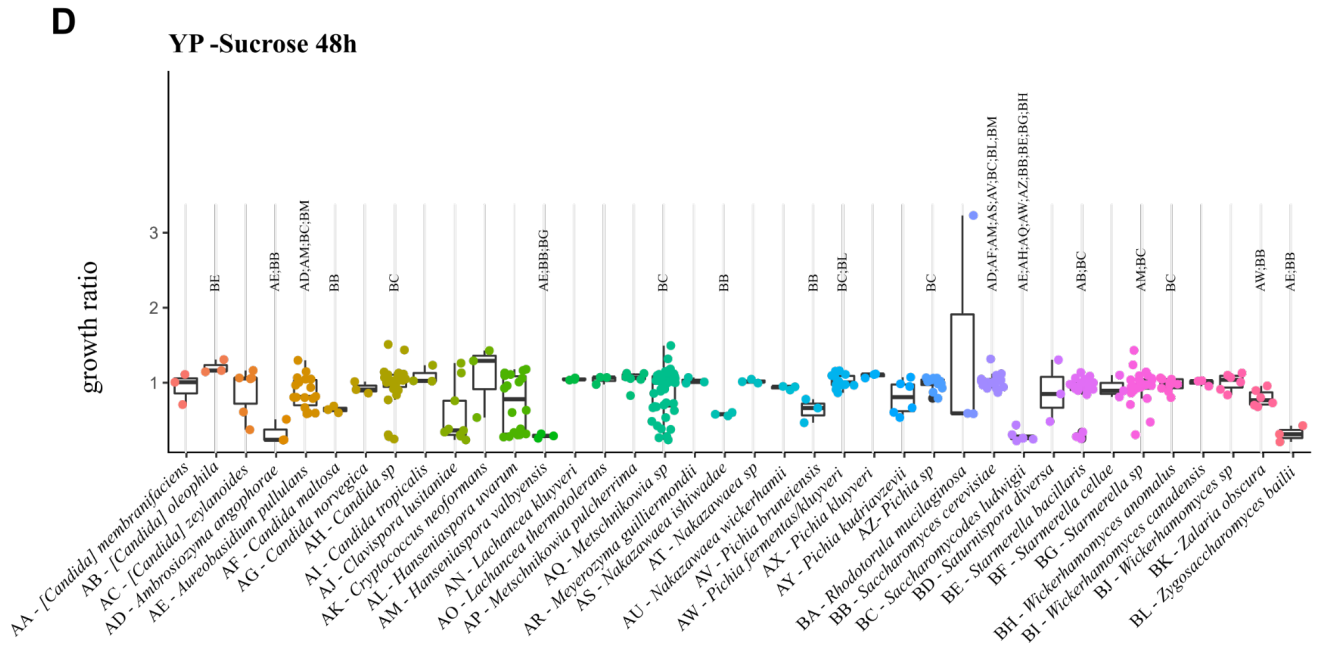

**E**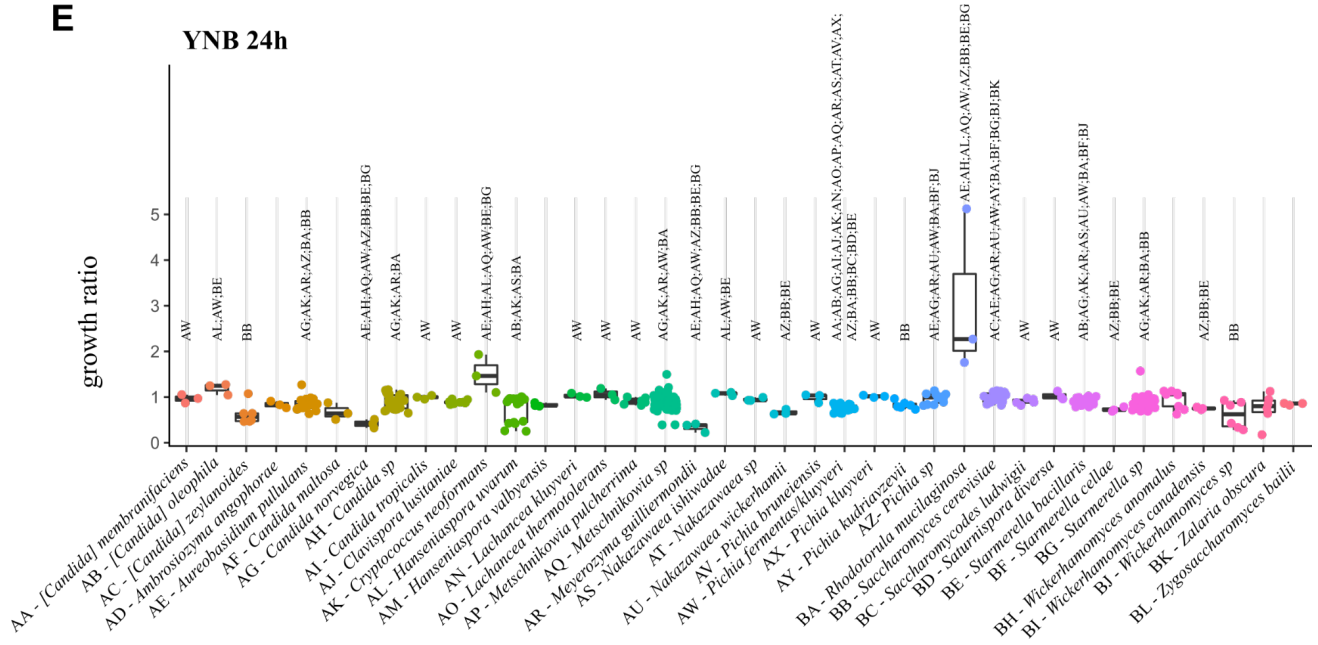**F**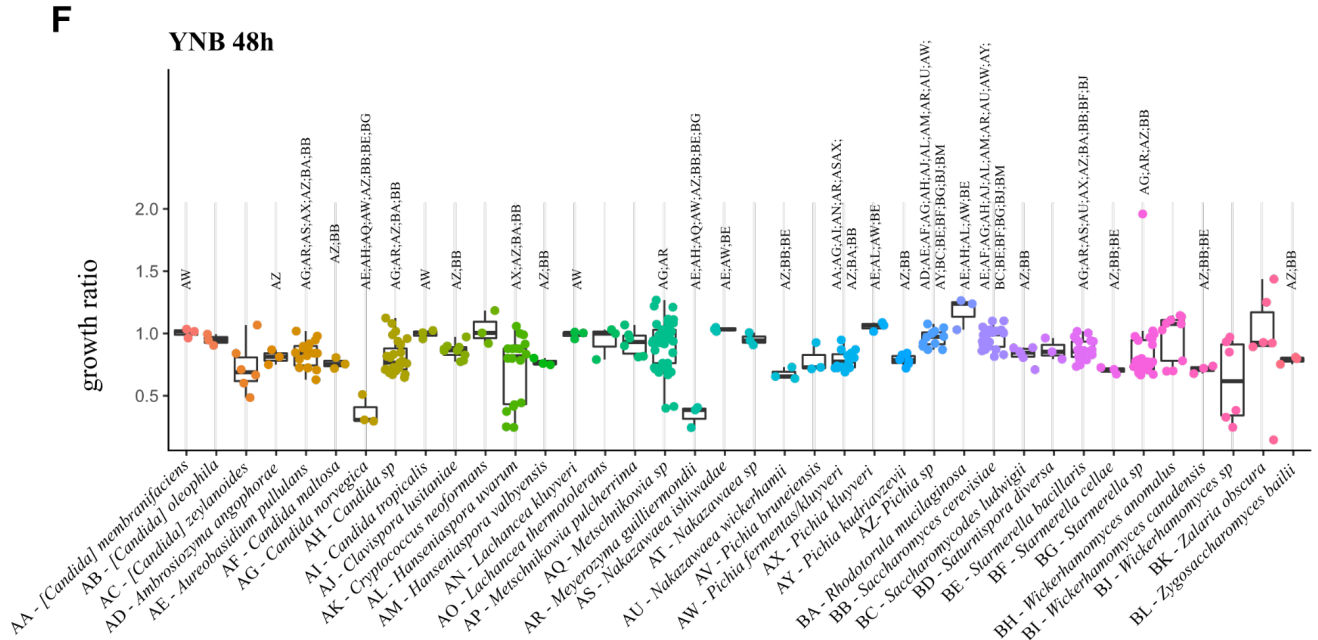

Supplementary Material

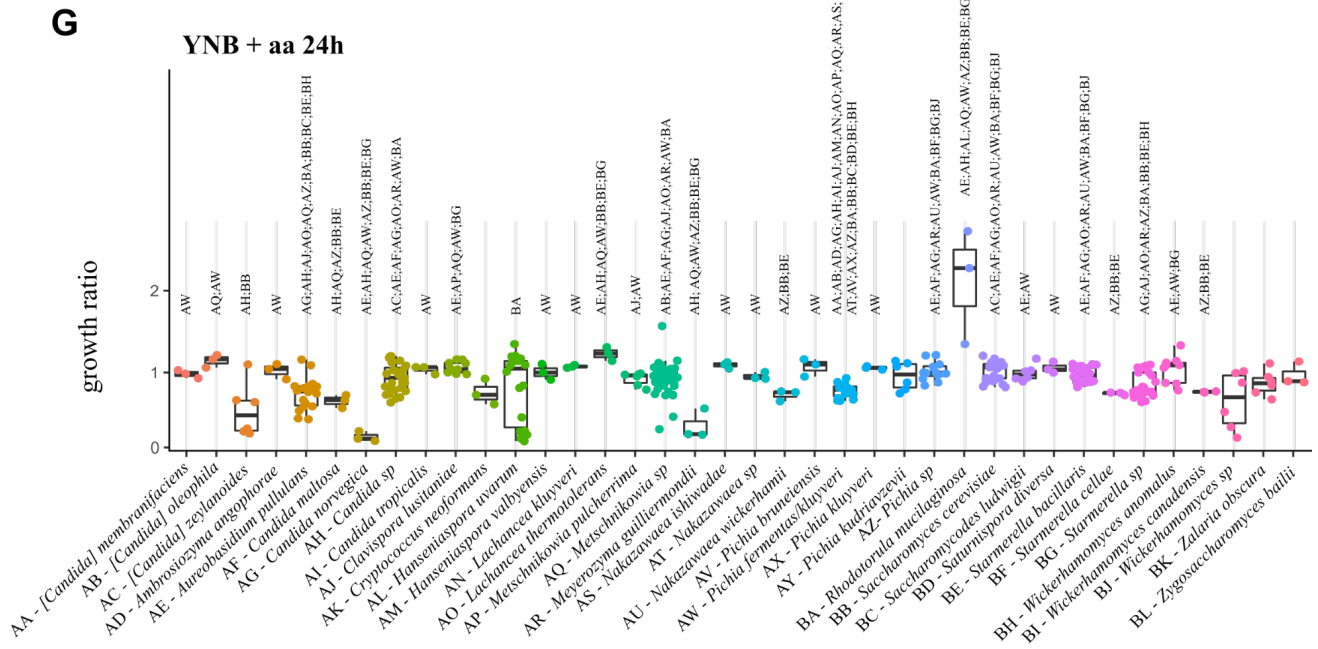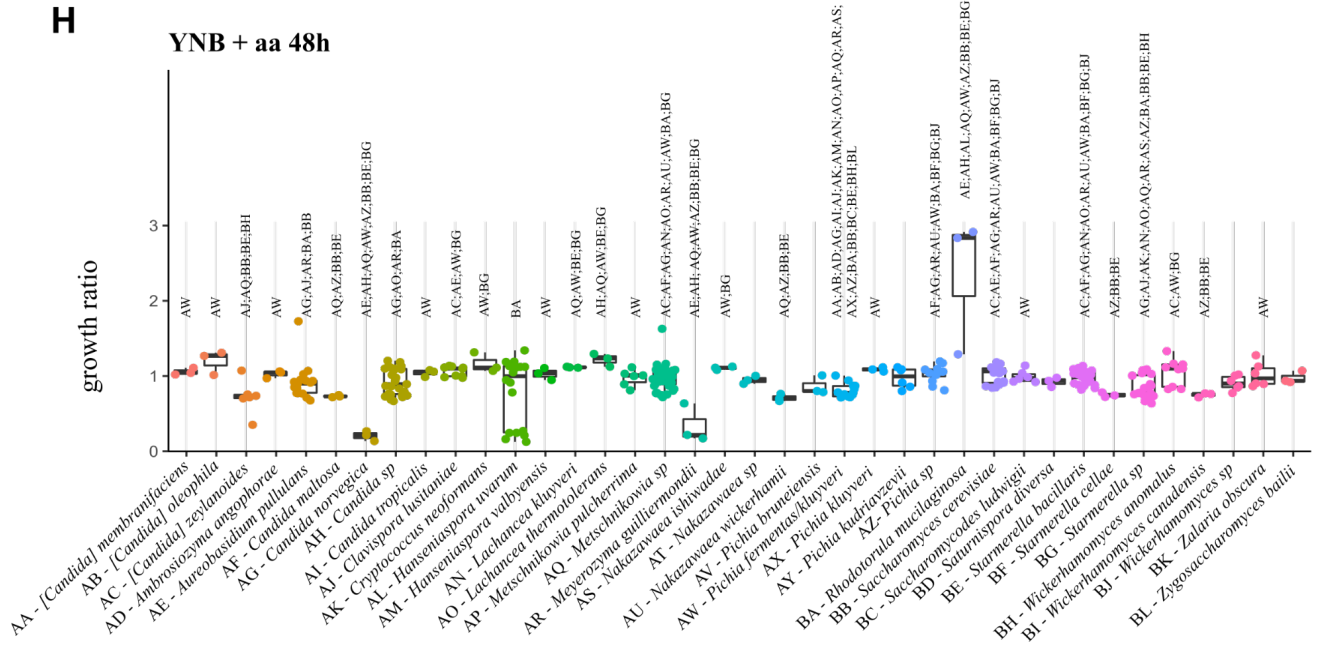



**Supplementary Figure 10. Yeast species clustering according to the quantified traits. A)** Results of Kmeans analysis to select the best number of clusters of samples distributed according to the components of the PCA performed on phenotypic data. **B)** Clustering of tested strains, representative of the species isolated in this study from insects' guts and of strains isolated from wine musts. **C)** Comparison of quantified traits among strains grouped according to the clustering inferred by means of the Kmeans analysis. The numbers on top of the points and boxplots indicate the clusters showing significantly different growth capabilities compared to the indicated cluster in the medium reported in the plot label. yIVC= yeasts isolated from Insects caught in Vineyards used as Controls; yIVW= yeasts isolated from Insects caught in Vineyards close to Woods.

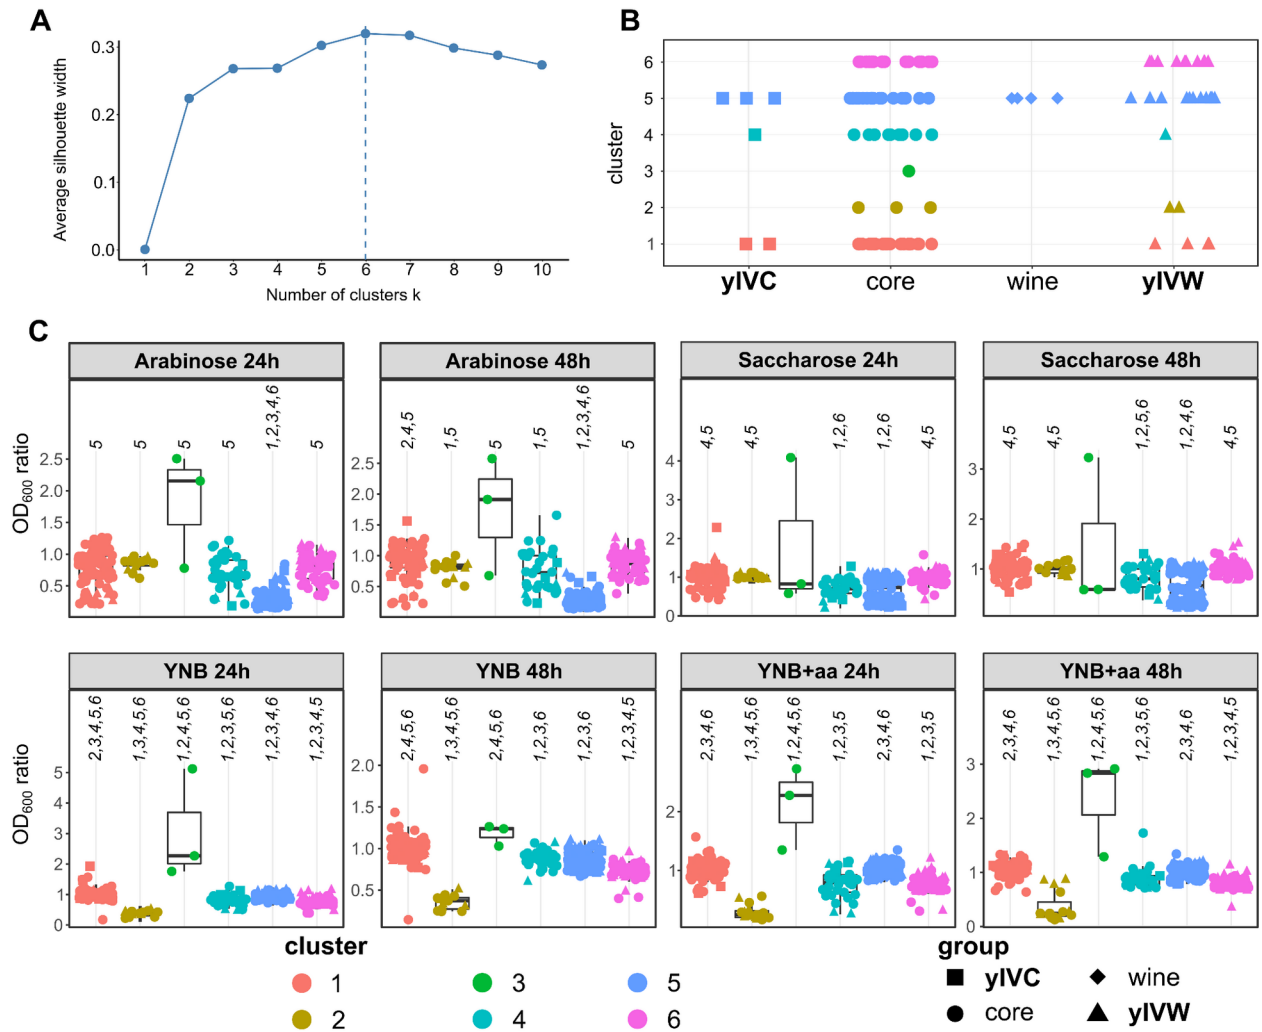

Supplementary Material

**Supplementary Table 6. Results of Wilcoxon-Mann-Whitney tests on phenotypes of tested strains.** Wilcoxon-Mann-Whitney tests were performed to compare the growth capabilities of strains grouped according to the clustering based on the PCA coordinates (see Fig. 3B-C and Supplementary Table 4). Only significant results are shown ( $\text{fdr} < 0.05$ ).

| condition     | groupA | groupB | W    | p.value  | fdr      |
|---------------|--------|--------|------|----------|----------|
| Arabinose 48h | 1      | 2      | 922  | 1.10E-02 | 2.04E-02 |
| YNB 24h       | 1      | 2      | 1290 | 1.76E-09 | 7.91E-09 |
| YNB 48h       | 1      | 2      | 1290 | 1.76E-09 | 7.91E-09 |
| YNB+aa 24h    | 1      | 2      | 1305 | 7.25E-10 | 3.87E-09 |
| YNB+aa 48h    | 1      | 2      | 1291 | 1.66E-09 | 7.91E-09 |
| YNB 24h       | 1      | 3      | 1    | 3.74E-03 | 7.37E-03 |
| YNB+aa 24h    | 1      | 3      | 1    | 3.74E-03 | 7.37E-03 |
| YNB+aa 48h    | 1      | 3      | 4    | 4.62E-03 | 8.88E-03 |
| Arabinose 48h | 1      | 4      | 1852 | 1.45E-02 | 2.64E-02 |
| Sucrose 24h   | 1      | 4      | 2434 | 4.48E-09 | 1.79E-08 |
| Sucrose 48h   | 1      | 4      | 2245 | 1.99E-06 | 6.09E-06 |
| YNB 24h       | 1      | 4      | 2353 | 7.06E-08 | 2.42E-07 |
| YNB 48h       | 1      | 4      | 2385 | 2.44E-08 | 8.78E-08 |
| YNB+aa 24h    | 1      | 4      | 2357 | 6.20E-08 | 2.18E-07 |
| YNB+aa 48h    | 1      | 4      | 2392 | 1.92E-08 | 7.10E-08 |
| Arabinose 24h | 1      | 5      | 8746 | 5.06E-25 | 1.04E-23 |
| Arabinose 48h | 1      | 5      | 8939 | 2.63E-27 | 1.26E-25 |
| Sucrose 24h   | 1      | 5      | 7414 | 4.16E-12 | 3.33E-11 |
| Sucrose 48h   | 1      | 5      | 7899 | 3.09E-16 | 3.42E-15 |
| YNB 24h       | 1      | 5      | 6511 | 3.72E-06 | 1.11E-05 |
| YNB 48h       | 1      | 5      | 7559 | 2.84E-13 | 2.72E-12 |
| YNB 24h       | 1      | 6      | 5998 | 4.05E-20 | 5.85E-19 |
| YNB 48h       | 1      | 6      | 6358 | 2.58E-25 | 7.26E-24 |

|               |   |   |      |          |          |
|---------------|---|---|------|----------|----------|
| YNB+aa 24h    | 1 | 6 | 5946 | 2.02E-19 | 2.65E-18 |
| YNB+aa 48h    | 1 | 6 | 6139 | 4.44E-22 | 7.99E-21 |
| Arabinose 48h | 2 | 1 | 383  | 1.10E-02 | 2.04E-02 |
| YNB 24h       | 2 | 1 | 15   | 1.76E-09 | 7.91E-09 |
| YNB 48h       | 2 | 1 | 15   | 1.76E-09 | 7.91E-09 |
| YNB+aa 24h    | 2 | 1 | 0    | 7.25E-10 | 3.87E-09 |
| YNB+aa 48h    | 2 | 1 | 14   | 1.66E-09 | 7.91E-09 |
| YNB 24h       | 2 | 3 | 0    | 2.45E-03 | 5.69E-03 |
| YNB 48h       | 2 | 3 | 0    | 2.45E-03 | 5.69E-03 |
| YNB+aa 24h    | 2 | 3 | 0    | 2.45E-03 | 5.69E-03 |
| YNB+aa 48h    | 2 | 3 | 0    | 2.45E-03 | 5.69E-03 |
| Sucrose 24h   | 2 | 4 | 463  | 7.40E-08 | 2.48E-07 |
| Sucrose 48h   | 2 | 4 | 370  | 5.70E-03 | 1.07E-02 |
| YNB 24h       | 2 | 4 | 4    | 2.20E-11 | 1.58E-10 |
| YNB 48h       | 2 | 4 | 0    | 1.83E-12 | 1.55E-11 |
| YNB+aa 24h    | 2 | 4 | 20   | 4.92E-09 | 1.91E-08 |
| YNB+aa 48h    | 2 | 4 | 35   | 1.33E-07 | 4.27E-07 |
| Arabinose 24h | 2 | 5 | 1612 | 5.84E-10 | 3.36E-09 |
| Arabinose 48h | 2 | 5 | 1609 | 6.76E-10 | 3.74E-09 |
| Sucrose 24h   | 2 | 5 | 1275 | 3.31E-04 | 8.65E-04 |
| Sucrose 48h   | 2 | 5 | 1236 | 1.01E-03 | 2.54E-03 |
| YNB 24h       | 2 | 5 | 0    | 3.93E-10 | 2.36E-09 |
| YNB 48h       | 2 | 5 | 0    | 3.93E-10 | 2.36E-09 |
| YNB+aa 24h    | 2 | 5 | 0    | 3.93E-10 | 2.36E-09 |
| YNB+aa 48h    | 2 | 5 | 15   | 8.22E-10 | 4.23E-09 |
| YNB 24h       | 2 | 6 | 18   | 3.87E-09 | 1.59E-08 |
| YNB 48h       | 2 | 6 | 10   | 2.28E-09 | 9.67E-09 |
| YNB+aa 24h    | 2 | 6 | 10   | 2.28E-09 | 9.67E-09 |

Supplementary Material

|               |   |   |      |          |          |
|---------------|---|---|------|----------|----------|
| YNB+aa 48h    | 2 | 6 | 161  | 1.42E-05 | 4.16E-05 |
| YNB 24h       | 3 | 1 | 260  | 3.74E-03 | 7.37E-03 |
| YNB+aa 24h    | 3 | 1 | 260  | 3.74E-03 | 7.37E-03 |
| YNB+aa 48h    | 3 | 1 | 257  | 4.62E-03 | 8.88E-03 |
| YNB 24h       | 3 | 2 | 45   | 2.45E-03 | 5.69E-03 |
| YNB 48h       | 3 | 2 | 45   | 2.45E-03 | 5.69E-03 |
| YNB+aa 24h    | 3 | 2 | 45   | 2.45E-03 | 5.69E-03 |
| YNB+aa 48h    | 3 | 2 | 45   | 2.45E-03 | 5.69E-03 |
| YNB 24h       | 3 | 4 | 99   | 2.80E-04 | 7.47E-04 |
| YNB 48h       | 3 | 4 | 97   | 1.12E-03 | 2.78E-03 |
| YNB+aa 24h    | 3 | 4 | 99   | 2.80E-04 | 7.47E-04 |
| YNB+aa 48h    | 3 | 4 | 98   | 5.60E-04 | 1.44E-03 |
| Arabinose 24h | 3 | 5 | 323  | 3.52E-03 | 7.33E-03 |
| Arabinose 48h | 3 | 5 | 323  | 3.52E-03 | 7.33E-03 |
| YNB 24h       | 3 | 5 | 324  | 3.32E-03 | 7.33E-03 |
| YNB 48h       | 3 | 5 | 320  | 4.18E-03 | 8.14E-03 |
| YNB+aa 24h    | 3 | 5 | 323  | 3.52E-03 | 7.33E-03 |
| YNB+aa 48h    | 3 | 5 | 323  | 3.52E-03 | 7.33E-03 |
| YNB 24h       | 3 | 6 | 225  | 3.61E-03 | 7.33E-03 |
| YNB 48h       | 3 | 6 | 225  | 3.61E-03 | 7.33E-03 |
| YNB+aa 24h    | 3 | 6 | 225  | 3.61E-03 | 7.33E-03 |
| YNB+aa 48h    | 3 | 6 | 225  | 3.61E-03 | 7.33E-03 |
| Arabinose 48h | 4 | 1 | 1019 | 1.45E-02 | 2.64E-02 |
| Sucrose 24h   | 4 | 1 | 437  | 4.48E-09 | 1.79E-08 |
| Sucrose 48h   | 4 | 1 | 626  | 1.99E-06 | 6.09E-06 |
| YNB 24h       | 4 | 1 | 518  | 7.06E-08 | 2.42E-07 |
| YNB 48h       | 4 | 1 | 486  | 2.44E-08 | 8.78E-08 |
| YNB+aa 24h    | 4 | 1 | 514  | 6.20E-08 | 2.18E-07 |

|               |   |   |      |          |          |
|---------------|---|---|------|----------|----------|
| YNB+aa 48h    | 4 | 1 | 479  | 1.92E-08 | 7.10E-08 |
| Sucrose 24h   | 4 | 2 | 32   | 7.40E-08 | 2.48E-07 |
| Sucrose 48h   | 4 | 2 | 125  | 5.70E-03 | 1.07E-02 |
| YNB 24h       | 4 | 2 | 491  | 2.20E-11 | 1.58E-10 |
| YNB 48h       | 4 | 2 | 495  | 1.83E-12 | 1.55E-11 |
| YNB+aa 24h    | 4 | 2 | 475  | 4.92E-09 | 1.91E-08 |
| YNB+aa 48h    | 4 | 2 | 460  | 1.33E-07 | 4.27E-07 |
| YNB 24h       | 4 | 3 | 0    | 2.80E-04 | 7.47E-04 |
| YNB 48h       | 4 | 3 | 2    | 1.12E-03 | 2.78E-03 |
| YNB+aa 24h    | 4 | 3 | 0    | 2.80E-04 | 7.47E-04 |
| YNB+aa 48h    | 4 | 3 | 1    | 5.60E-04 | 1.44E-03 |
| Arabinose 24h | 4 | 5 | 3263 | 5.63E-13 | 5.07E-12 |
| Arabinose 48h | 4 | 5 | 3332 | 4.52E-14 | 4.65E-13 |
| Sucrose 48h   | 4 | 5 | 2237 | 2.69E-02 | 4.84E-02 |
| YNB 24h       | 4 | 5 | 997  | 1.33E-04 | 3.69E-04 |
| YNB+aa 24h    | 4 | 5 | 541  | 1.54E-09 | 7.63E-09 |
| YNB+aa 48h    | 4 | 5 | 713  | 1.96E-07 | 6.14E-07 |
| Sucrose 24h   | 4 | 6 | 389  | 1.55E-08 | 5.88E-08 |
| Sucrose 48h   | 4 | 6 | 593  | 1.75E-05 | 5.03E-05 |
| YNB 24h       | 4 | 6 | 1655 | 5.42E-03 | 1.03E-02 |
| YNB 48h       | 4 | 6 | 2217 | 6.60E-11 | 4.53E-10 |
| YNB+aa 48h    | 4 | 6 | 1825 | 9.04E-05 | 2.55E-04 |
| Arabinose 48h | 5 | 1 | 457  | 2.63E-27 | 1.26E-25 |
| Sucrose 24h   | 5 | 1 | 1982 | 4.16E-12 | 3.33E-11 |
| Sucrose 48h   | 5 | 1 | 1497 | 3.09E-16 | 3.42E-15 |
| YNB 24h       | 5 | 1 | 2885 | 3.72E-06 | 1.11E-05 |
| YNB 48h       | 5 | 1 | 1837 | 2.84E-13 | 2.72E-12 |
| Arabinose 48h | 5 | 2 | 11   | 6.76E-10 | 3.74E-09 |

Supplementary Material

|               |   |   |      |          |          |
|---------------|---|---|------|----------|----------|
| Sucrose 24h   | 5 | 2 | 345  | 3.31E-04 | 8.65E-04 |
| Sucrose 48h   | 5 | 2 | 384  | 1.01E-03 | 2.54E-03 |
| YNB 24h       | 5 | 2 | 1620 | 3.93E-10 | 2.36E-09 |
| YNB 48h       | 5 | 2 | 1620 | 3.93E-10 | 2.36E-09 |
| YNB+aa 24h    | 5 | 2 | 1620 | 3.93E-10 | 2.36E-09 |
| YNB+aa 48h    | 5 | 2 | 1605 | 8.22E-10 | 4.23E-09 |
| Arabinose 48h | 5 | 3 | 1    | 3.52E-03 | 7.33E-03 |
| YNB 24h       | 5 | 3 | 0    | 3.32E-03 | 7.33E-03 |
| YNB 48h       | 5 | 3 | 4    | 4.18E-03 | 8.14E-03 |
| YNB+aa 24h    | 5 | 3 | 1    | 3.52E-03 | 7.33E-03 |
| YNB+aa 48h    | 5 | 3 | 1    | 3.52E-03 | 7.33E-03 |
| Arabinose 48h | 5 | 4 | 232  | 4.52E-14 | 4.65E-13 |
| Sucrose 48h   | 5 | 4 | 1327 | 2.69E-02 | 4.84E-02 |
| YNB 24h       | 5 | 4 | 2567 | 1.33E-04 | 3.69E-04 |
| YNB+aa 24h    | 5 | 4 | 3023 | 1.54E-09 | 7.63E-09 |
| YNB+aa 48h    | 5 | 4 | 2851 | 1.96E-07 | 6.14E-07 |
| Arabinose 24h | 5 | 6 | 178  | 4.49E-28 | 3.23E-26 |
| Arabinose 48h | 5 | 6 | 46   | 6.61E-30 | 9.52E-28 |
| Sucrose 24h   | 5 | 6 | 2182 | 1.16E-07 | 3.81E-07 |
| Sucrose 48h   | 5 | 6 | 1685 | 1.96E-11 | 1.48E-10 |
| YNB 24h       | 5 | 6 | 7101 | 4.89E-18 | 5.87E-17 |
| YNB 48h       | 5 | 6 | 7288 | 4.06E-20 | 5.85E-19 |
| YNB+aa 24h    | 5 | 6 | 7730 | 1.62E-25 | 5.82E-24 |
| YNB+aa 48h    | 5 | 6 | 7709 | 3.02E-25 | 7.26E-24 |
| YNB 24h       | 6 | 1 | 527  | 4.05E-20 | 5.85E-19 |
| YNB 48h       | 6 | 1 | 167  | 2.58E-25 | 7.26E-24 |
| YNB+aa 24h    | 6 | 1 | 579  | 2.02E-19 | 2.65E-18 |
| YNB+aa 48h    | 6 | 1 | 386  | 4.44E-22 | 7.99E-21 |

|               |   |   |      |          |          |
|---------------|---|---|------|----------|----------|
| YNB 24h       | 6 | 2 | 1107 | 3.87E-09 | 1.59E-08 |
| YNB 48h       | 6 | 2 | 1115 | 2.28E-09 | 9.67E-09 |
| YNB+aa 24h    | 6 | 2 | 1115 | 2.28E-09 | 9.67E-09 |
| YNB+aa 48h    | 6 | 2 | 964  | 1.42E-05 | 4.16E-05 |
| YNB 24h       | 6 | 3 | 0    | 3.61E-03 | 7.33E-03 |
| YNB 48h       | 6 | 3 | 0    | 3.61E-03 | 7.33E-03 |
| YNB+aa 24h    | 6 | 3 | 0    | 3.61E-03 | 7.33E-03 |
| YNB+aa 48h    | 6 | 3 | 0    | 3.61E-03 | 7.33E-03 |
| Sucrose 24h   | 6 | 4 | 2086 | 1.55E-08 | 5.88E-08 |
| Sucrose 48h   | 6 | 4 | 1882 | 1.75E-05 | 5.03E-05 |
| YNB 24h       | 6 | 4 | 820  | 5.42E-03 | 1.03E-02 |
| YNB 48h       | 6 | 4 | 258  | 6.60E-11 | 4.53E-10 |
| YNB+aa 48h    | 6 | 4 | 650  | 9.04E-05 | 2.55E-04 |
| Arabinose 24h | 6 | 5 | 7922 | 4.49E-28 | 3.23E-26 |
| Arabinose 48h | 6 | 5 | 8054 | 6.61E-30 | 9.52E-28 |
| Sucrose 24h   | 6 | 5 | 5918 | 1.16E-07 | 3.81E-07 |
| Sucrose 48h   | 6 | 5 | 6415 | 1.96E-11 | 1.48E-10 |
| YNB 24h       | 6 | 5 | 999  | 4.89E-18 | 5.87E-17 |
| YNB 48h       | 6 | 5 | 812  | 4.06E-20 | 5.85E-19 |
| YNB+aa 24h    | 6 | 5 | 370  | 1.62E-25 | 5.82E-24 |
| YNB+aa 48h    | 6 | 5 | 391  | 3.02E-25 | 7.26E-24 |

### Supplementary statistical results

Detailed results of the statistical analyses carried out in the study.

#### Number of insects

- Comparison of the number of insects caught in spring and harvesting samplings:  
Wilcoxon-Mann-Whitney  $W=70$   $p=0.001$
- Comparison of the number of insect species caught in Area 1 and Area 2:  
Wilcoxon-Mann-Whitney  $W=0$ ,  $fdr=0.026$
- Comparison of the number of insect species caught in Area 1 and Area 3:  
Wilcoxon-Mann-Whitney  $W=0$ ,  $fdr=0.027$

#### Yeast abundance

- Comparison of the yeast abundance in insects caught in vineyards close to wooded areas and in control vineyards:  
Wilcoxon-Mann-Whitney  $W=8987.5$ ,  $p=0.014$
- Comparison of the yeast abundance in insects caught in Area 3 and Area 1 vineyards:  
Wilcoxon-Mann-Whitney  $W=5171.2$ ,  $fdr=7.732e^{-03}$
- Comparison of the yeast abundance in insects caught in Area 3 and Area 2 vineyards:  
Wilcoxon-Mann-Whitney  $W=4358.5$ ,  $fdr=3.144e^{-05}$
- Comparison of the yeast abundance in *Polistes gallicus* and *Vespa crabro* insects:  
Wilcoxon-Mann-Whitney  $W=187$ ,  $fdr=2.098e^{-04}$
- Comparison of the yeast abundance in *Polistes gallicus* and *Vespula germanica* insects:  
Wilcoxon-Mann-Whitney  $W=364$ ,  $fdr=1.226e^{-03}$
- Comparison of the yeast abundance in *Polistes gallicus* and *Vespula vulgaris* insects:  
Wilcoxon-Mann-Whitney  $W=102$ ,  $fdr=8.272e^{-03}$
- Comparison of the yeast abundance in *Polistes dominulus* and *Vespa crabro* insects:  
Wilcoxon-Mann-Whitney  $W=569$ ,  $fdr=5.849e^{-06}$
- Comparison of the yeast abundance in *Polistes dominulus* and *Vespula germanica* insects:  
Wilcoxon-Mann-Whitney  $W=1072$ ,  $fdr=3.144e^{-05}$
- Comparison of the yeast abundance in *Polistes dominulus* and *Vespula vulgaris* insects:  
Wilcoxon-Mann-Whitney  $W=264$ ,  $fdr=4.423e^{-04}$
- Comparison of the yeast abundance in insects caught in the harvesting and spring samplings:  
Wilcoxon-Mann-Whitney  $W=3967.5$ ,  $p=5.849e^{-06}$

#### Yeast alpha diversity

- Comparison of the alpha diversity of yeast populations in insects caught in vineyards close to wooded areas (Mean  $\alpha$ -diversity= $1.44\pm 1.55$ ) and far from wooded areas (Mean  $\alpha$ -diversity= $1.02\pm 1.36$ ):  
Wilcoxon-Mann-Whitney  $W=5671.5$ ,  $p\text{-value}=0.017$
- Comparison of the alpha diversity of yeast populations in insects caught in spring (Mean  $\alpha$ -diversity= $0.71\pm 1.05$ ) and harvest 2020 (Mean  $\alpha$ -diversity= $1.35\pm 1.23$ ):  
Wilcoxon-Mann-Whitney  $W=1335.5$ ,  $p\text{-value}=0.0009$
- Comparison of the alpha diversity of yeast populations in insects caught in spring (Mean  $\alpha$ -diversity= $0.71\pm 1.05$ ) and harvest 2021 (Mean  $\alpha$ -diversity= $1.58\pm 1.73$ ):  
Wilcoxon-Mann-Whitney  $W=2917.5$ ,  $p\text{-value}=0.0008$



- Comparison of the alpha diversity of yeast populations in insects caught in harvest 2020 (Mean  $\alpha$ -diversity=1.35±1.23) and harvest 2021 (Mean  $\alpha$ -diversity=1.587±1.731):  
Wilcoxon-Mann-Whitney W = 2928, p-value = 0.880
- Comparison of the alpha diversity of yeast populations in insects caught in Area 1 (Mean  $\alpha$ -diversity=1.13±1.25) and Area 2 (Mean  $\alpha$ -diversity=0.73±1.07):  
Wilcoxon-Mann-Whitney W = 3419, p-value = 0.036
- Comparison of the alpha diversity of yeast populations in insects caught in Area 1 (Mean  $\alpha$ -diversity=1.13±1.25) and Area 3 (Mean  $\alpha$ -diversity=1.82±1.78):  
Wilcoxon-Mann-Whitney W = 2840, p-value = 0.017
- Comparison of the alpha diversity of yeast populations in insects caught in Area 2 (Mean  $\alpha$ -diversity=0.73±1.07) and Area 3 (Mean  $\alpha$ -diversity=1.82±1.78):  
Wilcoxon-Mann-Whitney W = 1849, p-value = 8.176e-05

Comparison of the alpha diversity of yeast populations in insects grouped according to their species.

|                                                                   | <i>Polistes gallicus</i><br>(Mean $\alpha$ -diversity=0.91±0.95) | <i>Polistes nimphus</i><br>(Mean $\alpha$ -diversity=1.11±1.24) | <i>Vespa crabro</i> (Mean $\alpha$ -diversity=2.65±1.95) | <i>Vespula germanica</i><br>(Mean $\alpha$ -diversity=1.35±1.48) | <i>Vespula vulgaris</i><br>(Mean $\alpha$ -diversity=1.82±1.42) |
|-------------------------------------------------------------------|------------------------------------------------------------------|-----------------------------------------------------------------|----------------------------------------------------------|------------------------------------------------------------------|-----------------------------------------------------------------|
| <i>Polistes dominulus</i><br>(Mean $\alpha$ -diversity=0.51±0.78) | W= 613<br>fdr=0.109                                              | W= 910<br>fdr=0.043                                             | W= 448<br>fdr= 6.17e-08                                  | W= 1364<br>fdr= 0.006                                            | W= 270<br>fdr= 0.001                                            |
| <i>Polistes gallicus</i><br>(Mean $\alpha$ -diversity=0.91±0.95)  |                                                                  | W= 378<br>fdr= 0.830                                            | W= 200<br>fdr= 0.002                                     | W= 557.5<br>fdr= 0.537                                           | W= 123<br>fdr= 0.091                                            |
| <i>Polistes nimphus</i><br>(Mean $\alpha$ -diversity=1.11±1.24)   |                                                                  |                                                                 | W= 347<br>fdr= 0.002                                     | W= 902.5<br>fdr= 0.774                                           | W= 212<br>fdr= 0.152                                            |
| <i>Vespa crabro</i> (Mean $\alpha$ -diversity=2.65±1.95)          |                                                                  |                                                                 |                                                          | W= 1414<br>fdr= 0.004                                            | W= 390<br>fdr= 0.254                                            |
| <i>Vespula germanica</i><br>(Mean $\alpha$ -diversity=1.35±1.48)  |                                                                  |                                                                 |                                                          |                                                                  | W= 373<br>fdr= 0.290                                            |

## Supplementary Material

### **Yeast beta diversity**

- Comparison of the beta diversity of yeast populations in the gut of wasps caught in vineyards close to woods and in vineyards used as controls (permANOVA on Jaccard distances):  
permANOVA Df= 1, F=1.984, P=0.010
- Comparison of the beta diversity of yeast populations in the gut of different wasps' species (permANOVA on Jaccard distances):  
permANOVA Df= 5, F=2.310, P=0.001
- Comparison of the beta diversity of yeast populations in the gut of wasps caught in vineyards located in different areas (permANOVA on Jaccard distances):  
permANOVA Df= 2, F=2.800, P=0.001
- Comparison of the beta diversity of yeast populations in the gut of wasps caught in different sampling seasons - spring and harvesting (permANOVA on Jaccard distances):  
permANOVA Df= 1, F=7.952, P=0.001
- Comparison of the beta diversity of yeast populations in the gut of wasps caught in different sampling years (permANOVA on Jaccard distances):  
permANOVA Df= 1, F=3.120, P=0.001
- Comparison of the beta diversity of yeast populations in the gut of wasps caught in vineyards close to woods and in vineyards used as controls (permANOVA on Unifrac distances):  
permANOVA Df= 1, F=2.088, P=0.011
- Comparison of the beta diversity of yeast populations in the gut of different wasps' species (permANOVA on Unifrac distances):  
permANOVA Df= 5, F=2.651, P=0.001
- Comparison of the beta diversity of yeast populations in the gut of wasps caught in vineyards located in different areas (permANOVA on Unifrac distances):  
permANOVA Df= 2, F=3.420, P=0.001
- Comparison of the beta diversity of yeast populations in the gut of wasps caught in different sampling seasons - spring and harvesting (permANOVA on Unifrac distances):  
permANOVA Df= 1, F=9.562, P=0.001
- Comparison of the beta diversity of yeast populations in the gut of wasps caught in different sampling years (permANOVA on Unifrac distances):  
permANOVA Df= 1, F=2.735, P=0.002
